# Supplementary material for: Reactive oxygen species drive evolution of pro-biofilm variants in pathogens by modulating cyclic-di-GMP levels
Source: PubMed Central journal article supplement (PMC5133437; doi:10.1098/rsob.160162), 2016-11-23
Supplement: rsob160162supp1.pdf [file rsob160162supp1.pdf]

**Supplementary Table S1:** Bacterial strains and plasmids

| Strain or plasmid                                                      | Relevant characteristics                                                                          | Source or reference |
|------------------------------------------------------------------------|---------------------------------------------------------------------------------------------------|---------------------|
| <b><i>P. aeruginosa</i></b>                                            |                                                                                                   |                     |
| PAO1                                                                   | Prototypic non-mucoid wild-type strain                                                            | <sup>1</sup>        |
| PAO1/ $\Delta$ <i>wspF</i>                                             | <i>wspF</i> knockout of PAO1 constructed by allelic exchange and sequenced                        | <sup>2</sup>        |
| PAO1/ $\Delta$ <i>wspF</i> $\Delta$ <i>pelA</i> $\Delta$ <i>pslBCD</i> | <i>wspF</i> , <i>pelA</i> , <i>pslBCD</i> triple knockout of PAO1 constructed by allelic exchange | <sup>3</sup>        |
| PAO1/ $\Delta$ <i>wspR</i>                                             | <i>wspR</i> knockout of PAO1 constructed by allelic exchange                                      | This study          |
| PAO1/p <sub>BAD</sub> - <i>psl</i>                                     | PAO1 with <i>psl</i> gene with arabinose-inducible <i>BAD</i> promoter                            | <sup>4</sup>        |

|                                                           |                                                                                                   |   |
|-----------------------------------------------------------|---------------------------------------------------------------------------------------------------|---|
| PAO1/ <i>p<sub>lac</sub>-yhjH</i>                         | Tc <sup>r</sup> ; PAO1 containing the<br><i>p<sub>lac</sub>-yhjH</i> vector                       | 5 |
| PAO1/ $\Delta$ <i>pelA</i>                                | <i>pelA</i> knockout of PAO1<br>constructed by allelic<br>exchange                                | 6 |
| PAO1/ $\Delta$ <i>psBCD</i>                               | <i>psBCD</i> knockout of PAO1<br>constructed by allelic<br>exchange                               | 6 |
| PAO1/ $\Delta$ <i>pelA</i> $\Delta$ <i>psBCD</i>          | <i>pelA</i> and <i>psBCD</i> double<br>knockout of PAO1<br>constructed by allelic<br>exchange     | 6 |
| PAO1/ <i>p<sub>lac</sub>-yedQ</i>                         | Gm <sup>r</sup> ; PAO1 containing the<br><i>p<sub>lac</sub>-yedQ</i> vector                       | 3 |
| PAO1/ $\Delta$ <i>pelA</i> / <i>p<sub>lac</sub>-yedQ</i>  | Gm <sup>r</sup> ; PAO1/ $\Delta$ <i>pelA</i> containing<br>the <i>p<sub>lac</sub>-yedQ</i> vector | 3 |
| PAO1/ $\Delta$ <i>psBCD</i> / <i>p<sub>lac</sub>-yedQ</i> | Gm <sup>r</sup> ; PAO1/ $\Delta$ <i>psBCD</i><br>containing the <i>p<sub>lac</sub>-yedQ</i>       | 3 |

|                                                           |                                                                                                |              |
|-----------------------------------------------------------|------------------------------------------------------------------------------------------------|--------------|
|                                                           | vector                                                                                         |              |
| PAO1/ $\Delta pelA\Delta ps/BCD/p_{lac^-}$<br><i>yedQ</i> | Gm <sup>r</sup> ; PAO1/ $\Delta pelA\Delta ps/BCD$<br>containing the $p_{lac^-yedQ}$<br>vector | <sup>3</sup> |
| PAO1/ $p_{cdrA-gfp}$                                      | Gm <sup>r</sup> ; PAO1 containing the<br>$p_{cdrA-gfp}$ vector                                 | <sup>2</sup> |
| <b><i>B. cenocepacia</i></b>                              |                                                                                                |              |
| <i>B. cenocepacia</i> 111                                 | Prototypic wild-type strain                                                                    | <sup>7</sup> |
| <i>B. cenocepacia</i> / $p_{lac^-yedQ}$                   | Gm <sup>r</sup> ; <i>B. cenocepacia</i> 111<br>containing the $p_{lac^-yedQ}$<br>vector        | This study   |
| <i>B. cenocepacia</i> / $p_{lac^-yhjH}$                   | Tc <sup>r</sup> ; <i>B. cenocepacia</i> 111<br>containing the $p_{lac^-yhjH}$<br>vector        | This study   |
| <b><i>K. pneumoniae</i></b>                               |                                                                                                |              |
| <i>K. pneumoniae</i> KP-1                                 | Prototypic wild-type strain                                                                    | <sup>8</sup> |
| <i>K. pneumoniae</i> / $p_{lac^-yedQ}$                    | Gm <sup>r</sup> ; <i>K. pneumoniae</i><br>containing the $p_{lac^-yedQ}$                       | This study   |

|                                               |                                                                                                                                                                                   |                       |
|-----------------------------------------------|-----------------------------------------------------------------------------------------------------------------------------------------------------------------------------------|-----------------------|
|                                               | vector                                                                                                                                                                            |                       |
| <i>K. pneumoniae</i> / p <sub>lac</sub> -yjhH | Tc <sup>r</sup> ; <i>K. pneumoniae</i><br>containing the p <sub>lac</sub> -yjhH<br>vector                                                                                         | This study            |
| <b><i>E. coli</i></b>                         |                                                                                                                                                                                   |                       |
| DH5α                                          | F <sup>-</sup> , ø80dlacZΔM15,<br>Δ(lacZYAargF)U169, deoR,<br>recA1, endA1, hsdR17(rK <sup>-</sup> ,<br>mK <sup>+</sup> ), phoA, supE44, λ <sup>-</sup> , thi-<br>1,gyrA96, relA1 | Laboratory Collection |
| <b>Plasmids</b>                               |                                                                                                                                                                                   |                       |
| pUCp22                                        | Ap <sup>r</sup> Gm <sup>r</sup> ; broad-host-range<br>cloning vector                                                                                                              | <sup>9</sup>          |
| pRK600                                        | Cm <sup>r</sup> ; ori ColE1 RK2 Mob <sup>+</sup><br>RK2-Tra <sup>+</sup> ; helper vector for<br>conjugation                                                                       | <sup>10</sup>         |
| p <sub>lac</sub> -yedQ                        | Gm <sup>r</sup> ; pUCP22 carrying the<br>yedQ gene                                                                                                                                | <sup>3</sup>          |

|                             |                                                                              |              |
|-----------------------------|------------------------------------------------------------------------------|--------------|
| <i>p<sub>lac</sub>-yhjH</i> | Tc <sup>r</sup> ; pBBR1MCS3 carrying the <i>yhjH</i> gene                    | <sup>5</sup> |
| <i>p<sub>cdrA</sub>-gfp</i> | Apr Gm <sup>r</sup> ; pUCP22 carrying the <i>p<sub>cdrA</sub>-gfp</i> fusion | <sup>2</sup> |

**Table S2. Summary of genes/ regions that were mutated in the PAO1 control colonies and RSCV isolates compared to the PAO1 ancestor.**

| <b>Control 1</b>            |                                                  |
|-----------------------------|--------------------------------------------------|
| Region/ Gene with mutations | Functional Group                                 |
| 64793                       | Non-coding region                                |
| 721718                      | Non-coding region                                |
| 788573                      | Non-coding region                                |
| 788581                      | Non-coding region                                |
| 789185                      | Non-coding region                                |
| 4699910                     | Non-coding region                                |
| 5242141                     | Non-coding region                                |
| PA0720                      | helix destabilizing protein of bacteriophage Pf1 |
| PA1458                      | two-component sensor                             |
| exsC                        | exoenzyme S synthesis protein C                  |
| PA2877                      | transcriptional regulator                        |
| <b>Control 2</b>            |                                                  |
| Region/ Gene with mutations | Functional Group                                 |
| 64793                       | Non-coding region                                |
| 721622                      | Non-coding region                                |

|         |                                                  |
|---------|--------------------------------------------------|
| 788573  | Non-coding region                                |
| 788581  | Non-coding region                                |
| 789170  | Non-coding region                                |
| 789185  | Non-coding region                                |
| 794290  | Non-coding region                                |
| 794291  | Non-coding region                                |
| 4699910 | Non-coding region                                |
| 5242141 | Non-coding region                                |
| PA0727  | Hypothetical protein                             |
| PA0720  | helix destabilizing protein of bacteriophage Pf1 |
| PA1458  | two-component sensor                             |
| exsC    | exoenzyme S synthesis protein C                  |
| PA2877  | transcriptional regulator                        |

**RSCV 1**

| Region/ Gene with mutations | Functional Group                                 |
|-----------------------------|--------------------------------------------------|
| 64793                       | Non-coding region                                |
| 721622                      | Non-coding region                                |
| 788573                      | Non-coding region                                |
| 788581                      | Non-coding region                                |
| 789170                      | Non-coding region                                |
| 789185                      | Non-coding region                                |
| 794290                      | Non-coding region                                |
| 794291                      | Non-coding region                                |
| 4699910                     | Non-coding region                                |
| 5242141                     | Non-coding region                                |
| PA0727                      | Hypothetical protein                             |
| PA0720                      | helix destabilizing protein of bacteriophage Pf1 |
| PA1458                      | two-component sensor                             |
| exsC                        | exoenzyme S synthesis protein C                  |

|        |                                    |
|--------|------------------------------------|
| PA2877 | transcriptional regulator          |
| wspF   | chemotaxis-specific methylesterase |
| mexT   | transcriptional regulator MexT     |

### RSCV 2

| Region/ Gene with mutations | Functional Group                                 |
|-----------------------------|--------------------------------------------------|
| 64793                       | Non-coding region                                |
| 721670                      | Non-coding region                                |
| 721718                      | Non-coding region                                |
| 721725                      | Non-coding region                                |
| 721740                      | Non-coding region                                |
| 788573                      | Non-coding region                                |
| 788581                      | Non-coding region                                |
| 789170                      | Non-coding region                                |
| 789185                      | Non-coding region                                |
| 789266                      | Non-coding region                                |
| 789332                      | Non-coding region                                |
| 4699910                     | Non-coding region                                |
| 5242141                     | Non-coding region                                |
| PA0726                      | Hypothetical protein                             |
| PA0727                      | Hypothetical protein                             |
| PA2046                      | Hypothetical protein                             |
| PA0720                      | helix destabilizing protein of bacteriophage Pf1 |
| exsC                        | exoenzyme S synthesis protein C                  |
| PA2877                      | transcriptional regulator                        |
| wspF                        | chemotaxis-specific methylesterase               |

### RSCV 3

| Region/ Gene with mutations | Functional Group  |
|-----------------------------|-------------------|
| 64793                       | Non-coding region |

|         |                                                  |
|---------|--------------------------------------------------|
| 721611  | Non-coding region                                |
| 788573  | Non-coding region                                |
| 788581  | Non-coding region                                |
| 789170  | Non-coding region                                |
| 789185  | Non-coding region                                |
| 789266  | Non-coding region                                |
| 789288  | Non-coding region                                |
| 790604  | Non-coding region                                |
| 4699910 | Non-coding region                                |
| 5242141 | Non-coding region                                |
| PA0718  | Hypothetical protein                             |
| PA2451  | Hypothetical protein                             |
| PA0721  | Hypothetical protein                             |
| PA0725  | Hypothetical protein                             |
| PA0727  | Hypothetical protein                             |
| PA0683  | type II secretion system protein                 |
| PA0720  | helix destabilizing protein of bacteriophage Pf1 |
| PA0724  | phage coat protein A                             |
| PA1458  | two-component sensor                             |
| exsC    | exoenzyme S synthesis protein C                  |
| PA2877  | transcriptional regulator                        |
| wspF    | chemotaxis-specific methylesterase               |

#### RSCV 4

| Region/ Gene with mutations | Functional Group  |
|-----------------------------|-------------------|
| 64793                       | Non-coding region |
| 721670                      | Non-coding region |
| 721718                      | Non-coding region |
| 721725                      | Non-coding region |
| 721740                      | Non-coding region |



|         |                                                  |
|---------|--------------------------------------------------|
| 788573  | Non-coding region                                |
| 788581  | Non-coding region                                |
| 789170  | Non-coding region                                |
| 789185  | Non-coding region                                |
| 789266  | Non-coding region                                |
| 4699910 | Non-coding region                                |
| 5242141 | Non-coding region                                |
| PA0721  | hypothetical protein                             |
| PA0727  | Hypothetical protein                             |
| PA0724  | phage coat protein A                             |
| PA0720  | helix destabilizing protein of bacteriophage Pf1 |
| PA1458  | two-component sensor                             |
| exsC    | exoenzyme S synthesis protein C                  |
| PA2877  | transcriptional regulator                        |
| wspF    | chemotaxis-specific methyltransferase            |
| fha1    | Fha domain-containing protein                    |

#### RSCV 5

| Region/ Gene with mutations | Functional Group  |
|-----------------------------|-------------------|
| 64793                       | Non-coding region |
| 721670                      | Non-coding region |
| 721718                      | Non-coding region |
| 721725                      | Non-coding region |
| 721740                      | Non-coding region |
| 788573                      | Non-coding region |
| 788581                      | Non-coding region |
| 789170                      | Non-coding region |
| 789185                      | Non-coding region |
| 789266                      | Non-coding region |
| 794430                      | Non-coding region |

|        |                                    |
|--------|------------------------------------|
| PA0726 | hypothetical protein               |
| PA0724 | phage coat protein A               |
| PA1458 | two-component sensor               |
| exsC   | exoenzyme S synthesis protein C    |
| PA2877 | transcriptional regulator          |
| wspF   | chemotaxis-specific methylesterase |
| fha1   | Fha domain-containing protein      |

### RSCV 6

| Region/ Gene with mutations | Functional Group                                    |
|-----------------------------|-----------------------------------------------------|
| 64793                       | Non-coding region                                   |
| 721670                      | Non-coding region                                   |
| 788573                      | Non-coding region                                   |
| 788581                      | Non-coding region                                   |
| 789170                      | Non-coding region                                   |
| 789185                      | Non-coding region                                   |
| 789266                      | Non-coding region                                   |
| 789288                      | Non-coding region                                   |
| PA0727                      | hypothetical protein                                |
| PA0748                      | still frameshift probable transcriptional regulator |
| PA0724                      | phage coat protein A                                |
| napA                        | nitrate reductase catalytic subunit                 |
| PA1458                      | two-component sensor                                |
| exsC                        | exoenzyme S synthesis protein C                     |
| PA2877                      | transcriptional regulator                           |
| wspF                        | chemotaxis-specific methylesterase                  |
| uvrD                        | DNA-dependent helicase II                           |

### RSCV 7

| Region/ Gene with mutations | Functional Group |
|-----------------------------|------------------|
|-----------------------------|------------------|

|         |                                    |
|---------|------------------------------------|
| 64793   | Non-coding region                  |
| 721670  | Non-coding region                  |
| 721718  | Non-coding region                  |
| 721725  | Non-coding region                  |
| 721740  | Non-coding region                  |
| 788573  | Non-coding region                  |
| 788581  | Non-coding region                  |
| 789170  | Non-coding region                  |
| 789185  | Non-coding region                  |
| 4699910 | Non-coding region                  |
| PA0727  | hypothetical protein               |
| exsC    | exoenzyme S synthesis protein C    |
| PA2877  | transcriptional regulator          |
| wspF    | chemotaxis-specific methylesterase |

**RSCV 8**

| Region/ Gene with mutations | Functional Group     |
|-----------------------------|----------------------|
| 64793                       | Non-coding region    |
| 721670                      | Non-coding region    |
| 721725                      | Non-coding region    |
| 788573                      | Non-coding region    |
| 788581                      | Non-coding region    |
| 789170                      | Non-coding region    |
| 789185                      | Non-coding region    |
| 789266                      | Non-coding region    |
| 789288                      | Non-coding region    |
| 789332                      | Non-coding region    |
| 4699910                     | Non-coding region    |
| 5242141                     | Non-coding region    |
| PA0718                      | hypothetical protein |

|        |                                    |
|--------|------------------------------------|
| PA0727 | hypothetical protein               |
| PA1458 | two-component sensor               |
| exsC   | exoenzyme S synthesis protein C    |
| PA2877 | transcriptional regulator          |
| wspF   | chemotaxis-specific methylesterase |

### RSCV 9

| Region/ Gene with mutations | Functional Group                   |
|-----------------------------|------------------------------------|
| 64793                       | Non-coding region                  |
| 721670                      | Non-coding region                  |
| 721718                      | Non-coding region                  |
| 721725                      | Non-coding region                  |
| 721740                      | Non-coding region                  |
| 788573                      | Non-coding region                  |
| 788581                      | Non-coding region                  |
| 789170                      | Non-coding region                  |
| 789185                      | Non-coding region                  |
| 789266                      | Non-coding region                  |
| 789288                      | Non-coding region                  |
| 789332                      | Non-coding region                  |
| 794430                      | Non-coding region                  |
| 4699910                     | Non-coding region                  |
| 5242141                     | Non-coding region                  |
| PA0718                      | hypothetical protein               |
| PA0726                      | hypothetical protein               |
| PA0727                      | hypothetical protein               |
| PA1458                      | two-component sensor               |
| exsC                        | exoenzyme S synthesis protein C    |
| PA2877                      | transcriptional regulator          |
| wspF                        | chemotaxis-specific methylesterase |

| <b>RSCV 10</b>              |                                       |
|-----------------------------|---------------------------------------|
| Region/ Gene with mutations | Functional Group                      |
| 64793                       | Non-coding region                     |
| 64793                       | Non-coding region                     |
| 721670                      | Non-coding region                     |
| 721718                      | Non-coding region                     |
| 721725                      | Non-coding region                     |
| 721740                      | Non-coding region                     |
| 788573                      | Non-coding region                     |
| 788581                      | Non-coding region                     |
| 789170                      | Non-coding region                     |
| 789185                      | Non-coding region                     |
| 789266                      | Non-coding region                     |
| 789288                      | Non-coding region                     |
| 789332                      | Non-coding region                     |
| 4699910                     | Non-coding region                     |
| PA0718                      | hypothetical protein                  |
| PA0727                      | hypothetical protein                  |
| PA1458                      | two-component sensor                  |
| exsC                        | exoenzyme S synthesis protein C       |
| PA2877                      | transcriptional regulator             |
| wspF                        | chemotaxis-specific methyltransferase |

**Table S3. Mutations identified in the PAO1 control colonies and RSCV isolates compared to the PAO1 ancestor.**

**Control 1**

| Region | Type | Gene | Original sequence | Sequence Change | Amino acid change | Functional Group |
|--------|------|------|-------------------|-----------------|-------------------|------------------|
|        |      |      |                   |                 |                   |                  |

|        |     |        |   |   |  |                                                  |
|--------|-----|--------|---|---|--|--------------------------------------------------|
| 64793  | SNV |        | A | A |  |                                                  |
| 64793  | SNV |        | A | G |  |                                                  |
| 721718 | SNV |        | A | G |  |                                                  |
| 788573 | SNV |        | T | C |  |                                                  |
| 788573 | SNV |        | T | T |  |                                                  |
| 788581 | SNV |        | G | G |  |                                                  |
| 788581 | SNV |        | G | T |  |                                                  |
| 789185 | SNV |        | A | A |  |                                                  |
| 789185 | SNV |        | A | C |  |                                                  |
| 790219 | SNV | PA0720 | C | C |  | helix destabilizing protein of bacteriophage Pf1 |
| 790219 | SNV | PA0720 | C | T |  | helix destabilizing protein of bacteriophage Pf1 |
| 794612 | SNV | PA0727 | C | C |  | hypothetical protein                             |
| 794612 | SNV | PA0727 | C | T |  | hypothetical protein                             |
| 794650 | SNV | PA0727 | G | C |  | hypothetical protein                             |
| 794650 | SNV | PA0727 | G | G |  | hypothetical protein                             |
| 795025 | SNV | PA0727 | G | C |  | hypothetical protein                             |
| 795025 | SNV | PA0727 | G | G |  | hypothetical protein                             |
| 795028 | SNV | PA0727 | G | G |  | hypothetical protein                             |
| 795028 | SNV | PA0727 | G | T |  | hypothetical protein                             |
| 795304 | SNV | PA0727 | C | C |  | hypothetical protein                             |
| 795304 | SNV | PA0727 | C | T |  | hypothetical protein                             |
| 795385 | SNV | PA0727 | T | C |  | hypothetical protein                             |
| 795385 | SNV | PA0727 | T | T |  | hypothetical protein                             |
| 795391 | SNV | PA0727 | G | C |  | hypothetical protein                             |
| 795391 | SNV | PA0727 | G | G |  | hypothetical protein                             |
| 795403 | SNV | PA0727 | C | C |  | hypothetical protein                             |
| 795403 | SNV | PA0727 | C | T |  | hypothetical protein                             |
| 795406 | SNV | PA0727 | G | A |  | hypothetical protein                             |
| 795406 | SNV | PA0727 | G | G |  | hypothetical protein                             |

|         |          |        |   |   |                         |                                 |
|---------|----------|--------|---|---|-------------------------|---------------------------------|
| 795409  | SNV      | PA0727 | A | A |                         | hypothetical protein            |
| 795409  | SNV      | PA0727 | A | G |                         | hypothetical protein            |
| 795412  | SNV      | PA0727 | A | A |                         | hypothetical protein            |
| 795412  | SNV      | PA0727 | A | G |                         | hypothetical protein            |
| 795424  | SNV      | PA0727 | C | C |                         | hypothetical protein            |
| 795424  | SNV      | PA0727 | C | T |                         | hypothetical protein            |
| 795434  | SNV      | PA0727 | A | A |                         | hypothetical protein            |
| 795434  | SNV      | PA0727 | A | G | NP_249418.1:p.Ser312Gly | hypothetical protein            |
| 795667  | SNV      | PA0727 | T | C |                         | hypothetical protein            |
| 795667  | SNV      | PA0727 | T | T |                         | hypothetical protein            |
| 795671  | SNV      | PA0727 | C | C |                         | hypothetical protein            |
| 795671  | SNV      | PA0727 | C | T |                         | hypothetical protein            |
| 795742  | SNV      | PA0727 | C | C |                         | hypothetical protein            |
| 795742  | SNV      | PA0727 | C | T |                         | hypothetical protein            |
| 795745  | SNV      | PA0727 | A | A |                         | hypothetical protein            |
| 795745  | SNV      | PA0727 | A | C |                         | hypothetical protein            |
| 795754  | SNV      | PA0727 | G | C |                         | hypothetical protein            |
| 795754  | SNV      | PA0727 | G | G |                         | hypothetical protein            |
| 795766  | SNV      | PA0727 | G | C |                         | hypothetical protein            |
| 795766  | SNV      | PA0727 | G | G |                         | hypothetical protein            |
| 1587916 | SNV      | PA1458 | T | C |                         | two-component sensor            |
| 1587919 | SNV      | PA1458 | G | T | NP_250149.1:p.Glu299Asp | two-component sensor            |
| 1856056 | SNV      | exsC   | C | C |                         | exoenzyme S synthesis protein C |
| 1856056 | SNV      | exsC   | C | G |                         | exoenzyme S synthesis protein C |
| 1856058 | SNV      | exsC   | A | A |                         | exoenzyme S synthesis protein C |
| 1856058 | SNV      | exsC   | A | G | NP_250401.1:p.Glu66Gly  | exoenzyme S synthesis protein C |
| 3230295 | SNV      | PA2877 | A | A |                         | transcriptional regulator       |
| 3230295 | SNV      | PA2877 | A | G | NP_251567.1:p.Leu293Pro | transcriptional regulator       |
| 4699910 | Deletion |        | C | - |                         |                                 |
| 5242141 | SNV      |        | G | C |                         |                                 |

|                |           |        |    |    |                         |                      |
|----------------|-----------|--------|----|----|-------------------------|----------------------|
| 5242141        | SNV       |        | G  | G  |                         |                      |
| 721663..721664 | MNV       |        | TC | CT |                         |                      |
| 794989..794990 | MNV       | PA0727 | CT | CT |                         | hypothetical protein |
| 794989..794990 | MNV       | PA0727 | CT | GC |                         | hypothetical protein |
| 795009..795010 | MNV       | PA0727 | AA | AA |                         | hypothetical protein |
| 795009..795010 | MNV       | PA0727 | AA | CG | NP_249418.1:p.Lys170Thr | hypothetical protein |
| 795019^795020  | Insertion | PA0727 | -  | -  |                         | hypothetical protein |
| 795019^795020  | Insertion | PA0727 | -  | T  | NP_249418.1:p.Asp174fs  | hypothetical protein |

## Control 2

| Region | Type | Gene | Original sequence | Sequence Change | Amino acid change | Functional Group |
|--------|------|------|-------------------|-----------------|-------------------|------------------|
| 64793  | SNV  |      | A                 | A               |                   |                  |
| 64793  | SNV  |      | A                 | G               |                   |                  |
| 721622 | SNV  |      | C                 | T               |                   |                  |
| 788573 | SNV  |      | T                 | C               |                   |                  |
| 788573 | SNV  |      | T                 | T               |                   |                  |
| 788581 | SNV  |      | G                 | G               |                   |                  |
| 788581 | SNV  |      | G                 | T               |                   |                  |
| 789170 | SNV  |      | C                 | C               |                   |                  |
| 789170 | SNV  |      | C                 | T               |                   |                  |
| 789185 | SNV  |      | A                 | A               |                   |                  |
| 789185 | SNV  |      | A                 | C               |                   |                  |
| 794290 | SNV  |      | C                 | C               |                   |                  |



|        |     |        |   |   |  |                      |
|--------|-----|--------|---|---|--|----------------------|
| 794290 | SNV |        | C | T |  |                      |
| 794291 | SNV |        | C | T |  |                      |
| 795025 | SNV | PA0727 | G | C |  | hypothetical protein |
| 795025 | SNV | PA0727 | G | G |  | hypothetical protein |
| 795028 | SNV | PA0727 | G | G |  | hypothetical protein |
| 795028 | SNV | PA0727 | G | T |  | hypothetical protein |
| 795301 | SNV | PA0727 | A | A |  | hypothetical protein |
| 795301 | SNV | PA0727 | A | G |  | hypothetical protein |
| 795310 | SNV | PA0727 | C | C |  | hypothetical protein |
| 795310 | SNV | PA0727 | C | T |  | hypothetical protein |
| 795313 | SNV | PA0727 | T | C |  | hypothetical protein |
| 795313 | SNV | PA0727 | T | T |  | hypothetical protein |
| 795349 | SNV | PA0727 | C | C |  | hypothetical protein |
| 795349 | SNV | PA0727 | C | T |  | hypothetical protein |
| 795355 | SNV | PA0727 | T | C |  | hypothetical protein |
| 795355 | SNV | PA0727 | T | T |  | hypothetical protein |
| 795370 | SNV | PA0727 | T | C |  | hypothetical protein |
| 795370 | SNV | PA0727 | T | T |  | hypothetical protein |
| 795391 | SNV | PA0727 | G | C |  | hypothetical protein |
| 795391 | SNV | PA0727 | G | G |  | hypothetical protein |
| 795406 | SNV | PA0727 | G | A |  | hypothetical protein |
| 795406 | SNV | PA0727 | G | G |  | hypothetical protein |
| 795409 | SNV | PA0727 | A | A |  | hypothetical protein |
| 795409 | SNV | PA0727 | A | G |  | hypothetical protein |
| 795412 | SNV | PA0727 | A | A |  | hypothetical protein |
| 795412 | SNV | PA0727 | A | G |  | hypothetical protein |
| 795424 | SNV | PA0727 | C | C |  | hypothetical protein |
| 795424 | SNV | PA0727 | C | T |  | hypothetical protein |
| 795667 | SNV | PA0727 | T | C |  | hypothetical protein |
| 795667 | SNV | PA0727 | T | T |  | hypothetical protein |

|                |           |        |    |    |                         |                                 |
|----------------|-----------|--------|----|----|-------------------------|---------------------------------|
| 795671         | SNV       | PA0727 | C  | C  |                         | hypothetical protein            |
| 795671         | SNV       | PA0727 | C  | T  |                         | hypothetical protein            |
| 795745         | SNV       | PA0727 | A  | A  |                         | hypothetical protein            |
| 795745         | SNV       | PA0727 | A  | C  |                         | hypothetical protein            |
| 795754         | SNV       | PA0727 | G  | C  |                         | hypothetical protein            |
| 795754         | SNV       | PA0727 | G  | G  |                         | hypothetical protein            |
| 795766         | SNV       | PA0727 | G  | C  |                         | hypothetical protein            |
| 795766         | SNV       | PA0727 | G  | G  |                         | hypothetical protein            |
| 1587916        | SNV       | PA1458 | T  | C  |                         | two-component sensor            |
| 1587919        | SNV       | PA1458 | G  | T  | NP_250149.1:p.Glu299Asp | two-component sensor            |
| 1587941        | SNV       | PA1458 | T  | G  | NP_250149.1:p.Ser307Ala | two-component sensor            |
| 1587943        | SNV       | PA1458 | G  | A  |                         | two-component sensor            |
| 1856056        | SNV       | exsC   | C  | C  |                         | exoenzyme S synthesis protein C |
| 1856056        | SNV       | exsC   | C  | G  |                         | exoenzyme S synthesis protein C |
| 1856058        | SNV       | exsC   | A  | A  |                         | exoenzyme S synthesis protein C |
| 1856058        | SNV       | exsC   | A  | G  | NP_250401.1:p.Glu66Gly  | exoenzyme S synthesis protein C |
| 3230295        | SNV       | PA2877 | A  | A  |                         | transcriptional regulator       |
| 3230295        | SNV       | PA2877 | A  | G  | NP_251567.1:p.Leu293Pro | transcriptional regulator       |
| 4699910        | Deletion  |        | C  | -  |                         |                                 |
| 5242141        | SNV       |        | G  | C  |                         |                                 |
| 5242141        | SNV       |        | G  | G  |                         |                                 |
| 789219..789220 | MNV       |        | GG | AT |                         |                                 |
| 789219..789220 | MNV       |        | GG | GG |                         |                                 |
| 794290..794291 | MNV       |        | CC | CC |                         |                                 |
| 794290..794291 | MNV       |        | CC | TT |                         |                                 |
| 794989..794990 | MNV       | PA0727 | CT | CT |                         | hypothetical protein            |
| 794989..794990 | MNV       | PA0727 | CT | GC |                         | hypothetical protein            |
| 795009..795010 | MNV       | PA0727 | AA | AA |                         | hypothetical protein            |
| 795009..795010 | MNV       | PA0727 | AA | CG | NP_249418.1:p.Lys170Thr | hypothetical protein            |
| 795019^795020  | Insertion | PA0727 | -  | -  |                         | hypothetical protein            |

|               |           |        |   |   |                        |                      |  |
|---------------|-----------|--------|---|---|------------------------|----------------------|--|
| 795019^795020 | Insertion | PA0727 | - | T | NP_249418.1:p.Asp174fs | hypothetical protein |  |
|---------------|-----------|--------|---|---|------------------------|----------------------|--|

### RSCV 1

| Region | Type | Gene | Original sequence | Sequence Change | Amino acid change | Functional Group |
|--------|------|------|-------------------|-----------------|-------------------|------------------|
| 64793  | SNV  |      | A                 | A               |                   |                  |
| 64793  | SNV  |      | A                 | G               |                   |                  |
| 721622 | SNV  |      | C                 | T               |                   |                  |
| 788573 | SNV  |      | T                 | C               |                   |                  |
| 788573 | SNV  |      | T                 | T               |                   |                  |
| 788581 | SNV  |      | G                 | G               |                   |                  |
| 788581 | SNV  |      | G                 | T               |                   |                  |
| 789170 | SNV  |      | C                 | C               |                   |                  |
| 789170 | SNV  |      | C                 | T               |                   |                  |
| 789185 | SNV  |      | A                 | A               |                   |                  |
| 789185 | SNV  |      | A                 | C               |                   |                  |
| 794290 | SNV  |      | C                 | C               |                   |                  |

|        |     |        |   |   |  |                      |
|--------|-----|--------|---|---|--|----------------------|
| 794290 | SNV |        | C | T |  |                      |
| 794291 | SNV |        | C | T |  |                      |
| 795025 | SNV | PA0727 | G | C |  | hypothetical protein |
| 795025 | SNV | PA0727 | G | G |  | hypothetical protein |
| 795028 | SNV | PA0727 | G | G |  | hypothetical protein |
| 795028 | SNV | PA0727 | G | T |  | hypothetical protein |
| 795301 | SNV | PA0727 | A | A |  | hypothetical protein |
| 795301 | SNV | PA0727 | A | G |  | hypothetical protein |
| 795310 | SNV | PA0727 | C | C |  | hypothetical protein |
| 795310 | SNV | PA0727 | C | T |  | hypothetical protein |
| 795313 | SNV | PA0727 | T | C |  | hypothetical protein |
| 795313 | SNV | PA0727 | T | T |  | hypothetical protein |
| 795349 | SNV | PA0727 | C | C |  | hypothetical protein |
| 795349 | SNV | PA0727 | C | T |  | hypothetical protein |
| 795355 | SNV | PA0727 | T | C |  | hypothetical protein |
| 795355 | SNV | PA0727 | T | T |  | hypothetical protein |
| 795370 | SNV | PA0727 | T | C |  | hypothetical protein |
| 795370 | SNV | PA0727 | T | T |  | hypothetical protein |
| 795391 | SNV | PA0727 | G | C |  | hypothetical protein |
| 795391 | SNV | PA0727 | G | G |  | hypothetical protein |
| 795406 | SNV | PA0727 | G | A |  | hypothetical protein |
| 795406 | SNV | PA0727 | G | G |  | hypothetical protein |
| 795409 | SNV | PA0727 | A | A |  | hypothetical protein |
| 795409 | SNV | PA0727 | A | G |  | hypothetical protein |
| 795412 | SNV | PA0727 | A | A |  | hypothetical protein |
| 795412 | SNV | PA0727 | A | G |  | hypothetical protein |
| 795424 | SNV | PA0727 | C | C |  | hypothetical protein |
| 795424 | SNV | PA0727 | C | T |  | hypothetical protein |
| 795667 | SNV | PA0727 | T | C |  | hypothetical protein |
| 795667 | SNV | PA0727 | T | T |  | hypothetical protein |

|                  |          |        |          |          |                         |                                          |
|------------------|----------|--------|----------|----------|-------------------------|------------------------------------------|
| 795671           | SNV      | PA0727 | C        | C        |                         | hypothetical protein                     |
| 795671           | SNV      | PA0727 | C        | T        |                         | hypothetical protein                     |
| 795745           | SNV      | PA0727 | A        | A        |                         | hypothetical protein                     |
| 795745           | SNV      | PA0727 | A        | C        |                         | hypothetical protein                     |
| 795754           | SNV      | PA0727 | G        | C        |                         | hypothetical protein                     |
| 795754           | SNV      | PA0727 | G        | G        |                         | hypothetical protein                     |
| 795766           | SNV      | PA0727 | G        | C        |                         | hypothetical protein                     |
| 795766           | SNV      | PA0727 | G        | G        |                         | hypothetical protein                     |
| 1587916          | SNV      | PA1458 | T        | C        |                         | two-component sensor                     |
| 1587919          | SNV      | PA1458 | G        | T        | NP_250149.1:p.Glu299Asp | two-component sensor                     |
| 1587941          | SNV      | PA1458 | T        | G        | NP_250149.1:p.Ser307Ala | two-component sensor                     |
| 1587943          | SNV      | PA1458 | G        | A        |                         | two-component sensor                     |
| 1856056          | SNV      | exsC   | C        | C        |                         | exoenzyme S synthesis protein C          |
| 1856056          | SNV      | exsC   | C        | G        |                         | exoenzyme S synthesis protein C          |
| 1856058          | SNV      | exsC   | A        | A        |                         | exoenzyme S synthesis protein C          |
| 1856058          | SNV      | exsC   | A        | G        | NP_250401.1:p.Glu66Gly  | exoenzyme S synthesis protein C          |
| 3230295          | SNV      | PA2877 | A        | A        |                         | transcriptional regulator                |
| 3230295          | SNV      | PA2877 | A        | G        | NP_251567.1:p.Leu293Pro | transcriptional regulator                |
| 4145193          | SNV      | wspF   | A        | G        | NP_252392.1:p.Ser252Pro | chemotaxis-specific<br>methyltransferase |
| 4699910          | Deletion |        | C        | -        |                         |                                          |
| 5242141          | SNV      |        | G        | C        |                         |                                          |
| 5242141          | SNV      |        | G        | G        |                         |                                          |
| 2807694..2807701 | Deletion | mexT   | CGGCCAGC | -        | NP_251182.1:p.Gln80fs   | transcriptional regulator MexT           |
| 2807694..2807701 | MNV      | mexT   | CGGCCAGC | CGGCCAGC |                         | transcriptional regulator MexT           |
| 789219..789220   | MNV      |        | GG       | AT       |                         |                                          |
| 789219..789220   | MNV      |        | GG       | GG       |                         |                                          |
| 794290..794291   | MNV      |        | CC       | CC       |                         |                                          |
| 794290..794291   | MNV      |        | CC       | TT       |                         |                                          |
| 794989..794990   | MNV      | PA0727 | CT       | CT       |                         | hypothetical protein                     |

|                |           |        |    |    |                         |                      |
|----------------|-----------|--------|----|----|-------------------------|----------------------|
| 794989..794990 | MNV       | PA0727 | CT | GC |                         | hypothetical protein |
| 795009..795010 | MNV       | PA0727 | AA | AA |                         | hypothetical protein |
| 795009..795010 | MNV       | PA0727 | AA | CG | NP_249418.1:p.Lys170Thr | hypothetical protein |
| 795019^795020  | Insertion | PA0727 | -  | -  |                         | hypothetical protein |
| 795019^795020  | Insertion | PA0727 | -  | T  | NP_249418.1:p.Asp174fs  | hypothetical protein |

## RSCV 2

| Region | Type | Gene | Original sequence | Sequence Change | Amino acid change | Functional Group |
|--------|------|------|-------------------|-----------------|-------------------|------------------|
| 64793  | SNV  |      | A                 | A               |                   |                  |
| 64793  | SNV  |      | A                 | G               |                   |                  |
| 721670 | SNV  |      | A                 | G               |                   |                  |
| 721718 | SNV  |      | A                 | G               |                   |                  |
| 721725 | SNV  |      | C                 | T               |                   |                  |
| 721740 | SNV  |      | C                 | T               |                   |                  |
| 788573 | SNV  |      | T                 | C               |                   |                  |
| 788573 | SNV  |      | T                 | T               |                   |                  |
| 788581 | SNV  |      | G                 | G               |                   |                  |
| 788581 | SNV  |      | G                 | T               |                   |                  |
| 789170 | SNV  |      | C                 | C               |                   |                  |
| 789170 | SNV  |      | C                 | T               |                   |                  |

|        |     |        |   |   |                         |                                                  |
|--------|-----|--------|---|---|-------------------------|--------------------------------------------------|
| 789185 | SNV |        | A | A |                         |                                                  |
| 789185 | SNV |        | A | C |                         |                                                  |
| 789266 | SNV |        | C | C |                         |                                                  |
| 789266 | SNV |        | C | T |                         |                                                  |
| 789332 | SNV |        | C | C |                         |                                                  |
| 789332 | SNV |        | C | T |                         |                                                  |
| 790485 | SNV | PA0720 | T | C | NP_249411.1:p.Met107Thr | helix destabilizing protein of bacteriophage Pf1 |
| 790486 | SNV | PA0720 | G | C | NP_249411.1:p.Met107Ile | helix destabilizing protein of bacteriophage Pf1 |
| 790486 | SNV | PA0720 | G | G |                         | helix destabilizing protein of bacteriophage Pf1 |
| 793242 | SNV | PA0726 | T | G |                         | hypothetical protein                             |
| 793242 | SNV | PA0726 | T | T |                         | hypothetical protein                             |
| 795025 | SNV | PA0727 | G | C |                         | hypothetical protein                             |
| 795025 | SNV | PA0727 | G | G |                         | hypothetical protein                             |
| 795028 | SNV | PA0727 | G | G |                         | hypothetical protein                             |
| 795028 | SNV | PA0727 | G | T |                         | hypothetical protein                             |
| 795296 | SNV | PA0727 | C | A | NP_249418.1:p.Leu266Ile | hypothetical protein                             |
| 795296 | SNV | PA0727 | C | C |                         | hypothetical protein                             |
| 795310 | SNV | PA0727 | C | C |                         | hypothetical protein                             |
| 795310 | SNV | PA0727 | C | T |                         | hypothetical protein                             |
| 795313 | SNV | PA0727 | T | C |                         | hypothetical protein                             |
| 795313 | SNV | PA0727 | T | T |                         | hypothetical protein                             |
| 795349 | SNV | PA0727 | C | C |                         | hypothetical protein                             |
| 795349 | SNV | PA0727 | C | T |                         | hypothetical protein                             |
| 795385 | SNV | PA0727 | T | C |                         | hypothetical protein                             |
| 795385 | SNV | PA0727 | T | T |                         | hypothetical protein                             |
| 795391 | SNV | PA0727 | G | C |                         | hypothetical protein                             |
| 795391 | SNV | PA0727 | G | G |                         | hypothetical protein                             |
| 795403 | SNV | PA0727 | C | C |                         | hypothetical protein                             |

|         |          |        |   |   |                         |                                 |
|---------|----------|--------|---|---|-------------------------|---------------------------------|
| 795403  | SNV      | PA0727 | C | T |                         | hypothetical protein            |
| 795409  | SNV      | PA0727 | A | A |                         | hypothetical protein            |
| 795409  | SNV      | PA0727 | A | G |                         | hypothetical protein            |
| 795412  | SNV      | PA0727 | A | A |                         | hypothetical protein            |
| 795412  | SNV      | PA0727 | A | G |                         | hypothetical protein            |
| 795424  | SNV      | PA0727 | C | C |                         | hypothetical protein            |
| 795424  | SNV      | PA0727 | C | T |                         | hypothetical protein            |
| 795432  | Deletion | PA0727 | A | - | NP_249418.1:p.Ser312fs  | hypothetical protein            |
| 795432  | SNV      | PA0727 | A | A |                         | hypothetical protein            |
| 795434  | SNV      | PA0727 | A | A |                         | hypothetical protein            |
| 795434  | SNV      | PA0727 | A | G | NP_249418.1:p.Ser312Gly | hypothetical protein            |
| 795472  | SNV      | PA0727 | G | C |                         | hypothetical protein            |
| 795472  | SNV      | PA0727 | G | G |                         | hypothetical protein            |
| 795667  | SNV      | PA0727 | T | C |                         | hypothetical protein            |
| 795667  | SNV      | PA0727 | T | T |                         | hypothetical protein            |
| 795671  | SNV      | PA0727 | C | C |                         | hypothetical protein            |
| 795671  | SNV      | PA0727 | C | T |                         | hypothetical protein            |
| 795742  | SNV      | PA0727 | C | C |                         | hypothetical protein            |
| 795742  | SNV      | PA0727 | C | T |                         | hypothetical protein            |
| 795745  | SNV      | PA0727 | A | A |                         | hypothetical protein            |
| 795745  | SNV      | PA0727 | A | C |                         | hypothetical protein            |
| 795754  | SNV      | PA0727 | G | C |                         | hypothetical protein            |
| 795754  | SNV      | PA0727 | G | G |                         | hypothetical protein            |
| 795766  | SNV      | PA0727 | G | C |                         | hypothetical protein            |
| 795766  | SNV      | PA0727 | G | G |                         | hypothetical protein            |
| 1856056 | SNV      | exsC   | C | C |                         | exoenzyme S synthesis protein C |
| 1856056 | SNV      | exsC   | C | G |                         | exoenzyme S synthesis protein C |
| 1856058 | SNV      | exsC   | A | A |                         | exoenzyme S synthesis protein C |
| 1856058 | SNV      | exsC   | A | G | NP_250401.1:p.Glu66Gly  | exoenzyme S synthesis protein C |



|                 |           |        |    |    |                         |                                                  |
|-----------------|-----------|--------|----|----|-------------------------|--------------------------------------------------|
| 2239547         | SNV       | PA2046 | T  | G  |                         |                                                  |
| 3230295         | SNV       | PA2877 | A  | A  |                         | transcriptional regulator                        |
| 3230295         | SNV       | PA2877 | A  | G  | NP_251567.1:p.Leu293Pro | transcriptional regulator                        |
| 4145673         | SNV       | wspF   | C  | A  | NP_252392.1:p.Glu92*    | chemotaxis-specific methyltransferase            |
| 4699910         | Deletion  |        | C  | -  |                         |                                                  |
| 5242141         | SNV       |        | G  | C  |                         |                                                  |
| 5242141         | SNV       |        | G  | G  |                         |                                                  |
| 2186927^2186928 | Insertion |        | -  | C  |                         |                                                  |
| 721663..721664  | MNV       |        | TC | CT |                         |                                                  |
| 789219..789220  | MNV       |        | GG | AT |                         |                                                  |
| 789219..789220  | MNV       |        | GG | GG |                         |                                                  |
| 790485..790486  | MNV       | PA0720 | TG | CC | NP_249411.1:p.Met107Thr | helix destabilizing protein of bacteriophage Pf1 |
| 790485..790486  | MNV       | PA0720 | TG | TG |                         | helix destabilizing protein of bacteriophage Pf1 |
| 794989..794990  | MNV       | PA0727 | CT | CT |                         | hypothetical protein                             |
| 794989..794990  | MNV       | PA0727 | CT | GC |                         | hypothetical protein                             |
| 795009..795010  | MNV       | PA0727 | AA | AA |                         | hypothetical protein                             |
| 795009..795010  | MNV       | PA0727 | AA | CG | NP_249418.1:p.Lys170Thr | hypothetical protein                             |
| 795019^795020   | Insertion | PA0727 | -  | -  |                         | hypothetical protein                             |
| 795019^795020   | Insertion | PA0727 | -  | T  | NP_249418.1:p.Asp174fs  | hypothetical protein                             |

### RSCV 3

| Region | Type | Gene | Original sequence | Sequence Change | Amino acid change | Functional Group |
|--------|------|------|-------------------|-----------------|-------------------|------------------|
| 64793  | SNV  |      | A                 | A               |                   |                  |
| 64793  | SNV  |      | A                 | G               |                   |                  |
| 721611 | SNV  |      | C                 | T               |                   |                  |
| 788573 | SNV  |      | T                 | C               |                   |                  |
| 788573 | SNV  |      | T                 | T               |                   |                  |
| 788581 | SNV  |      | G                 | G               |                   |                  |
| 788581 | SNV  |      | G                 | T               |                   |                  |
| 789170 | SNV  |      | C                 | C               |                   |                  |
| 789170 | SNV  |      | C                 | T               |                   |                  |
| 789185 | SNV  |      | A                 | A               |                   |                  |
| 789185 | SNV  |      | A                 | C               |                   |                  |
| 789266 | SNV  |      | C                 | C               |                   |                  |

|        |     |        |   |   |                         |                                                  |
|--------|-----|--------|---|---|-------------------------|--------------------------------------------------|
| 789266 | SNV |        | C | T |                         |                                                  |
| 789288 | SNV |        | C | C |                         |                                                  |
| 789288 | SNV |        | C | T |                         |                                                  |
| 789409 | SNV | PA0718 | C | C |                         | hypothetical protein                             |
| 789409 | SNV | PA0718 | C | G | NP_249409.1:p.Ala17Gly  | hypothetical protein                             |
| 789439 | SNV | PA0718 | T | C | NP_249409.1:p.Val27Ala  | hypothetical protein                             |
| 789439 | SNV | PA0718 | T | T |                         | hypothetical protein                             |
| 789470 | SNV | PA0718 | A | A |                         | hypothetical protein                             |
| 789470 | SNV | PA0718 | A | G |                         | hypothetical protein                             |
| 789473 | SNV | PA0718 | C | C |                         | hypothetical protein                             |
| 789473 | SNV | PA0718 | C | T |                         | hypothetical protein                             |
| 789476 | SNV | PA0718 | T | C |                         | hypothetical protein                             |
| 789476 | SNV | PA0718 | T | T |                         | hypothetical protein                             |
| 789505 | SNV | PA0718 | G | A | NP_249409.1:p.Gly49Asp  | hypothetical protein                             |
| 789505 | SNV | PA0718 | G | G |                         | hypothetical protein                             |
| 790477 | SNV | PA0720 | C | C |                         | helix destabilizing protein of bacteriophage Pf1 |
| 790477 | SNV | PA0720 | C | T |                         | helix destabilizing protein of bacteriophage Pf1 |
| 790485 | SNV | PA0720 | T | C | NP_249411.1:p.Met107Thr | helix destabilizing protein of bacteriophage Pf1 |
| 790485 | SNV | PA0720 | T | T |                         | helix destabilizing protein of bacteriophage Pf1 |
| 790580 | SNV | PA0720 | A | A |                         | helix destabilizing protein of bacteriophage Pf1 |
| 790580 | SNV | PA0720 | A | T | NP_249411.1:p.Thr139Ser | helix destabilizing protein of bacteriophage Pf1 |
| 790597 | SNV | PA0720 | G | C |                         | helix destabilizing protein of bacteriophage     |

|        |     |        |   |   |                         |                                                  |
|--------|-----|--------|---|---|-------------------------|--------------------------------------------------|
|        |     |        |   |   |                         | Pf1                                              |
| 790597 | SNV | PA0720 | G | G |                         | helix destabilizing protein of bacteriophage Pf1 |
| 790604 | SNV |        | C | C |                         |                                                  |
| 790604 | SNV |        | C | G |                         |                                                  |
| 790640 | SNV | PA0721 | C | C |                         | hypothetical protein                             |
| 790640 | SNV | PA0721 | C | T |                         | hypothetical protein                             |
| 792119 | SNV | PA0724 | C | C |                         | phage coat protein A                             |
| 792119 | SNV | PA0724 | C | T |                         | phage coat protein A                             |
| 792124 | SNV | PA0724 | G | A | NP_249415.1:p.Gly252Asp | phage coat protein A                             |
| 792124 | SNV | PA0724 | G | G |                         | phage coat protein A                             |
| 792359 | SNV | PA0724 | C | C |                         | phage coat protein A                             |
| 792359 | SNV | PA0724 | C | T |                         | phage coat protein A                             |
| 792401 | SNV | PA0724 | C | A | NP_249415.1:p.Asp344Glu | phage coat protein A                             |
| 792401 | SNV | PA0724 | C | C |                         | phage coat protein A                             |
| 792443 | SNV | PA0724 | T | C |                         | phage coat protein A                             |
| 792443 | SNV | PA0724 | T | T |                         | phage coat protein A                             |
| 792455 | SNV | PA0724 | C | C |                         | phage coat protein A                             |
| 792455 | SNV | PA0724 | C | T |                         | phage coat protein A                             |
| 792590 | SNV | PA0724 | G | A |                         | phage coat protein A                             |
| 792590 | SNV | PA0724 | G | G |                         | phage coat protein A                             |
| 792608 | SNV | PA0724 | C | C |                         | phage coat protein A                             |
| 792608 | SNV | PA0724 | C | T |                         | phage coat protein A                             |
| 792696 | SNV | PA0725 | C | C |                         | hypothetical protein                             |
| 792696 | SNV | PA0725 | C | T |                         | hypothetical protein                             |
| 794740 | SNV | PA0727 | G | A |                         | hypothetical protein                             |
| 794740 | SNV | PA0727 | G | G |                         | hypothetical protein                             |
| 794797 | SNV | PA0727 | T | C |                         | hypothetical protein                             |
| 794797 | SNV | PA0727 | T | T |                         | hypothetical protein                             |

|        |     |        |   |   |                         |                      |
|--------|-----|--------|---|---|-------------------------|----------------------|
| 794806 | SNV | PA0727 | T | C |                         | hypothetical protein |
| 794806 | SNV | PA0727 | T | T |                         | hypothetical protein |
| 795025 | SNV | PA0727 | G | C |                         | hypothetical protein |
| 795025 | SNV | PA0727 | G | G |                         | hypothetical protein |
| 795028 | SNV | PA0727 | G | G |                         | hypothetical protein |
| 795028 | SNV | PA0727 | G | T |                         | hypothetical protein |
| 795289 | SNV | PA0727 | C | C |                         | hypothetical protein |
| 795289 | SNV | PA0727 | C | G |                         | hypothetical protein |
| 795296 | SNV | PA0727 | C | A | NP_249418.1:p.Leu266Ile | hypothetical protein |
| 795296 | SNV | PA0727 | C | C |                         | hypothetical protein |
| 795301 | SNV | PA0727 | A | A |                         | hypothetical protein |
| 795301 | SNV | PA0727 | A | G |                         | hypothetical protein |
| 795304 | SNV | PA0727 | C | C |                         | hypothetical protein |
| 795304 | SNV | PA0727 | C | T |                         | hypothetical protein |
| 795310 | SNV | PA0727 | C | C |                         | hypothetical protein |
| 795310 | SNV | PA0727 | C | T |                         | hypothetical protein |
| 795313 | SNV | PA0727 | T | C |                         | hypothetical protein |
| 795313 | SNV | PA0727 | T | T |                         | hypothetical protein |
| 795349 | SNV | PA0727 | C | C |                         | hypothetical protein |
| 795349 | SNV | PA0727 | C | T |                         | hypothetical protein |
| 795355 | SNV | PA0727 | T | C |                         | hypothetical protein |
| 795355 | SNV | PA0727 | T | T |                         | hypothetical protein |
| 795385 | SNV | PA0727 | T | C |                         | hypothetical protein |
| 795385 | SNV | PA0727 | T | T |                         | hypothetical protein |
| 795391 | SNV | PA0727 | G | C |                         | hypothetical protein |
| 795391 | SNV | PA0727 | G | G |                         | hypothetical protein |
| 795403 | SNV | PA0727 | C | C |                         | hypothetical protein |
| 795403 | SNV | PA0727 | C | T |                         | hypothetical protein |
| 795406 | SNV | PA0727 | G | A |                         | hypothetical protein |
| 795406 | SNV | PA0727 | G | G |                         | hypothetical protein |

|         |     |        |   |   |                         |                                          |
|---------|-----|--------|---|---|-------------------------|------------------------------------------|
| 795409  | SNV | PA0727 | A | A |                         | hypothetical protein                     |
| 795409  | SNV | PA0727 | A | G |                         | hypothetical protein                     |
| 795412  | SNV | PA0727 | A | A |                         | hypothetical protein                     |
| 795412  | SNV | PA0727 | A | G |                         | hypothetical protein                     |
| 795424  | SNV | PA0727 | C | C |                         | hypothetical protein                     |
| 795424  | SNV | PA0727 | C | T |                         | hypothetical protein                     |
| 795667  | SNV | PA0727 | T | C |                         | hypothetical protein                     |
| 795667  | SNV | PA0727 | T | T |                         | hypothetical protein                     |
| 795671  | SNV | PA0727 | C | C |                         | hypothetical protein                     |
| 795671  | SNV | PA0727 | C | T |                         | hypothetical protein                     |
| 795742  | SNV | PA0727 | C | C |                         | hypothetical protein                     |
| 795742  | SNV | PA0727 | C | T |                         | hypothetical protein                     |
| 795745  | SNV | PA0727 | A | A |                         | hypothetical protein                     |
| 795745  | SNV | PA0727 | A | C |                         | hypothetical protein                     |
| 795754  | SNV | PA0727 | G | C |                         | hypothetical protein                     |
| 795754  | SNV | PA0727 | G | G |                         | hypothetical protein                     |
| 795766  | SNV | PA0727 | G | C |                         | hypothetical protein                     |
| 795766  | SNV | PA0727 | G | G |                         | hypothetical protein                     |
| 1587916 | SNV | PA1458 | T | C |                         | two-component sensor                     |
| 1587919 | SNV | PA1458 | G | T | NP_250149.1:p.Glu299Asp | two-component sensor                     |
| 1587941 | SNV | PA1458 | T | G | NP_250149.1:p.Ser307Ala | two-component sensor                     |
| 1587943 | SNV | PA1458 | G | A |                         | two-component sensor                     |
| 1856056 | SNV | exsC   | C | C |                         | exoenzyme S synthesis protein C          |
| 1856056 | SNV | exsC   | C | G |                         | exoenzyme S synthesis protein C          |
| 1856058 | SNV | exsC   | A | A |                         | exoenzyme S synthesis protein C          |
| 1856058 | SNV | exsC   | A | G | NP_250401.1:p.Glu66Gly  | exoenzyme S synthesis protein C          |
| 3230295 | SNV | PA2877 | A | A |                         | transcriptional regulator                |
| 3230295 | SNV | PA2877 | A | G | NP_251567.1:p.Leu293Pro | transcriptional regulator                |
| 4145318 | SNV | wspF   | G | T | NP_252392.1:p.Ala210Glu | chemotaxis-specific<br>methyltransferase |

|                 |           |        |    |    |                         |                                                  |
|-----------------|-----------|--------|----|----|-------------------------|--------------------------------------------------|
| 4699910         | Deletion  |        | C  | -  |                         |                                                  |
| 5242141         | SNV       |        | G  | C  |                         |                                                  |
| 5242141         | SNV       |        | G  | G  |                         |                                                  |
| 2753522^2753523 | Insertion | PA2451 | -  | C  |                         |                                                  |
| 740419^740420   | Insertion | PA0683 | -  | C  | NP_249374.1:p.Val73fs   | type II secretion system protein                 |
| 789219..789220  | MNV       |        | GG | AT |                         |                                                  |
| 789219..789220  | MNV       |        | GG | GG |                         |                                                  |
| 790485..790486  | MNV       | PA0720 | TG | CC | NP_249411.1:p.Met107Thr | helix destabilizing protein of bacteriophage Pf1 |
| 790485..790486  | MNV       | PA0720 | TG | TG |                         | helix destabilizing protein of bacteriophage Pf1 |
| 790521..790522  | MNV       | PA0720 | TG | CA | NP_249411.1:p.Val119Ala | helix destabilizing protein of bacteriophage Pf1 |
| 790521..790522  | MNV       | PA0720 | TG | TG |                         | helix destabilizing protein of bacteriophage Pf1 |
| 794989..794990  | MNV       | PA0727 | CT | CT |                         | hypothetical protein                             |
| 794989..794990  | MNV       | PA0727 | CT | GC |                         | hypothetical protein                             |
| 795009..795010  | MNV       | PA0727 | AA | AA |                         | hypothetical protein                             |
| 795009..795010  | MNV       | PA0727 | AA | CG | NP_249418.1:p.Lys170Thr | hypothetical protein                             |
| 795019^795020   | Insertion | PA0727 | -  | -  |                         | hypothetical protein                             |
| 795019^795020   | Insertion | PA0727 | -  | T  | NP_249418.1:p.Asp174fs  | hypothetical protein                             |

#### RSCV 4

| Region | Type | Gene | Original sequence | Sequence Change | Amino acid change | Functional Group |
|--------|------|------|-------------------|-----------------|-------------------|------------------|
| 64793  | SNV  |      | A                 | A               |                   |                  |
| 64793  | SNV  |      | A                 | G               |                   |                  |
| 721670 | SNV  |      | A                 | G               |                   |                  |
| 721718 | SNV  |      | A                 | G               |                   |                  |
| 721725 | SNV  |      | C                 | T               |                   |                  |
| 721740 | SNV  |      | C                 | T               |                   |                  |
| 788573 | SNV  |      | T                 | C               |                   |                  |
| 788573 | SNV  |      | T                 | T               |                   |                  |
| 788581 | SNV  |      | G                 | G               |                   |                  |
| 788581 | SNV  |      | G                 | T               |                   |                  |
| 789170 | SNV  |      | C                 | C               |                   |                  |
| 789170 | SNV  |      | C                 | T               |                   |                  |



|        |          |        |   |   |                         |                      |
|--------|----------|--------|---|---|-------------------------|----------------------|
| 789185 | SNV      |        | A | A |                         |                      |
| 789185 | SNV      |        | A | C |                         |                      |
| 789266 | SNV      |        | C | C |                         |                      |
| 789266 | SNV      |        | C | T |                         |                      |
| 790701 | SNV      | PA0721 | G | A | NP_249412.1:p.Ala29Thr  | hypothetical protein |
| 790701 | SNV      | PA0721 | G | G |                         | hypothetical protein |
| 792124 | SNV      | PA0724 | G | A | NP_249415.1:p.Gly252Asp | phage coat protein A |
| 792124 | SNV      | PA0724 | G | G |                         | phage coat protein A |
| 792443 | SNV      | PA0724 | T | C |                         | phage coat protein A |
| 792443 | SNV      | PA0724 | T | T |                         | phage coat protein A |
| 795025 | SNV      | PA0727 | G | C |                         | hypothetical protein |
| 795025 | SNV      | PA0727 | G | G |                         | hypothetical protein |
| 795028 | SNV      | PA0727 | G | G |                         | hypothetical protein |
| 795028 | SNV      | PA0727 | G | T |                         | hypothetical protein |
| 795385 | SNV      | PA0727 | T | C |                         | hypothetical protein |
| 795385 | SNV      | PA0727 | T | T |                         | hypothetical protein |
| 795391 | SNV      | PA0727 | G | C |                         | hypothetical protein |
| 795391 | SNV      | PA0727 | G | G |                         | hypothetical protein |
| 795403 | SNV      | PA0727 | C | C |                         | hypothetical protein |
| 795403 | SNV      | PA0727 | C | T |                         | hypothetical protein |
| 795406 | SNV      | PA0727 | G | A |                         | hypothetical protein |
| 795406 | SNV      | PA0727 | G | G |                         | hypothetical protein |
| 795409 | SNV      | PA0727 | A | A |                         | hypothetical protein |
| 795409 | SNV      | PA0727 | A | G |                         | hypothetical protein |
| 795412 | SNV      | PA0727 | A | A |                         | hypothetical protein |
| 795412 | SNV      | PA0727 | A | G |                         | hypothetical protein |
| 795424 | SNV      | PA0727 | C | C |                         | hypothetical protein |
| 795424 | SNV      | PA0727 | C | T |                         | hypothetical protein |
| 795432 | Deletion | PA0727 | A | - | NP_249418.1:p.Ser312fs  | hypothetical protein |
| 795432 | SNV      | PA0727 | A | A |                         | hypothetical protein |

|         |          |        |   |   |                         |                                    |
|---------|----------|--------|---|---|-------------------------|------------------------------------|
| 795434  | SNV      | PA0727 | A | A |                         | hypothetical protein               |
| 795434  | SNV      | PA0727 | A | G | NP_249418.1:p.Ser312Gly | hypothetical protein               |
| 795667  | SNV      | PA0727 | T | C |                         | hypothetical protein               |
| 795667  | SNV      | PA0727 | T | T |                         | hypothetical protein               |
| 795671  | SNV      | PA0727 | C | C |                         | hypothetical protein               |
| 795671  | SNV      | PA0727 | C | T |                         | hypothetical protein               |
| 795742  | SNV      | PA0727 | C | C |                         | hypothetical protein               |
| 795742  | SNV      | PA0727 | C | T |                         | hypothetical protein               |
| 795745  | SNV      | PA0727 | A | A |                         | hypothetical protein               |
| 795745  | SNV      | PA0727 | A | C |                         | hypothetical protein               |
| 795754  | SNV      | PA0727 | G | C |                         | hypothetical protein               |
| 795754  | SNV      | PA0727 | G | G |                         | hypothetical protein               |
| 795766  | SNV      | PA0727 | G | C |                         | hypothetical protein               |
| 795766  | SNV      | PA0727 | G | G |                         | hypothetical protein               |
| 1587916 | SNV      | PA1458 | T | C |                         | two-component sensor               |
| 1587919 | SNV      | PA1458 | G | T | NP_250149.1:p.Glu299Asp | two-component sensor               |
| 1587943 | SNV      | PA1458 | G | A |                         | two-component sensor               |
| 1856056 | SNV      | exsC   | C | C |                         | exoenzyme S synthesis protein C    |
| 1856056 | SNV      | exsC   | C | G |                         | exoenzyme S synthesis protein C    |
| 1856058 | SNV      | exsC   | A | A |                         | exoenzyme S synthesis protein C    |
| 1856058 | SNV      | exsC   | A | G | NP_250401.1:p.Glu66Gly  | exoenzyme S synthesis protein C    |
| 3230295 | SNV      | PA2877 | A | A |                         | transcriptional regulator          |
| 3230295 | SNV      | PA2877 | A | G | NP_251567.1:p.Leu293Pro | transcriptional regulator          |
| 4145042 | SNV      | wspF   | C | T | NP_252392.1:p.Cys302Tyr | chemotaxis-specific methylesterase |
| 4699910 | Deletion |        | C | - |                         |                                    |
| 5242141 | SNV      |        | G | C |                         |                                    |
| 5242141 | SNV      |        | G | G |                         |                                    |

|                |           |        |    |        |                                      |                               |
|----------------|-----------|--------|----|--------|--------------------------------------|-------------------------------|
| 721663..721664 | MNV       |        | TC | CT     |                                      |                               |
| 789219..789220 | MNV       |        | GG | AT     |                                      |                               |
| 789219..789220 | MNV       |        | GG | GG     |                                      |                               |
| 794989..794990 | MNV       | PA0727 | CT | CT     |                                      | hypothetical protein          |
| 794989..794990 | MNV       | PA0727 | CT | GC     |                                      | hypothetical protein          |
| 795009..795010 | MNV       | PA0727 | AA | AA     |                                      | hypothetical protein          |
| 795009..795010 | MNV       | PA0727 | AA | CG     | NP_249418.1:p.Lys170Thr              | hypothetical protein          |
| 795019^795020  | Insertion | PA0727 | -  | -      |                                      | hypothetical protein          |
| 795019^795020  | Insertion | PA0727 | -  | T      | NP_249418.1:p.Asp174fs               | hypothetical protein          |
| 98901^98902    | Insertion | fha1   | -  | -      |                                      | Fha domain-containing protein |
| 98901^98902    | Insertion | fha1   | -  | TGGCTG | NP_248771.1:p.Pro285_Ala286insGlnPro | Fha domain-containing protein |

## RSCV 5

| Region | Type | Gene | Original sequence | Sequence Change | Amino acid change | Functional Group |
|--------|------|------|-------------------|-----------------|-------------------|------------------|
| 64793  | SNV  |      | A                 | A               |                   |                  |
| 64793  | SNV  |      | A                 | G               |                   |                  |
| 721670 | SNV  |      | A                 | G               |                   |                  |
| 721718 | SNV  |      | A                 | G               |                   |                  |
| 721725 | SNV  |      | C                 | T               |                   |                  |
| 721740 | SNV  |      | C                 | T               |                   |                  |
| 788573 | SNV  |      | T                 | C               |                   |                  |
| 788573 | SNV  |      | T                 | T               |                   |                  |
| 788581 | SNV  |      | G                 | G               |                   |                  |
| 788581 | SNV  |      | G                 | T               |                   |                  |
| 789170 | SNV  |      | C                 | C               |                   |                  |

|        |     |        |   |   |                         |                      |
|--------|-----|--------|---|---|-------------------------|----------------------|
| 789170 | SNV |        | C | T |                         |                      |
| 789185 | SNV |        | A | A |                         |                      |
| 789185 | SNV |        | A | C |                         |                      |
| 789266 | SNV |        | C | C |                         |                      |
| 789266 | SNV |        | C | T |                         |                      |
| 792608 | SNV | PA0724 | C | C |                         | phage coat protein A |
| 792608 | SNV | PA0724 | C | T |                         | phage coat protein A |
| 793757 | SNV | PA0726 | C | C |                         | hypothetical protein |
| 793757 | SNV | PA0726 | C | G | NP_249417.1:p.Ala254Gly | hypothetical protein |
| 794001 | SNV | PA0726 | C | C |                         | hypothetical protein |
| 794001 | SNV | PA0726 | C | G | NP_249417.1:p.Asp335Glu | hypothetical protein |
| 794106 | SNV | PA0726 | G | C | NP_249417.1:p.Glu370Asp | hypothetical protein |
| 794106 | SNV | PA0726 | G | G |                         | hypothetical protein |
| 794140 | SNV | PA0726 | C | C |                         | hypothetical protein |
| 794140 | SNV | PA0726 | C | G | NP_249417.1:p.Pro382Ala | hypothetical protein |
| 794195 | SNV | PA0726 | C | C |                         | hypothetical protein |
| 794195 | SNV | PA0726 | C | T | NP_249417.1:p.Ala400Val | hypothetical protein |
| 794430 | SNV |        | C | C |                         |                      |
| 794430 | SNV |        | C | T |                         |                      |
| 794612 | SNV | PA0727 | C | C |                         | hypothetical protein |
| 794612 | SNV | PA0727 | C | T |                         | hypothetical protein |
| 794629 | SNV | PA0727 | T | C |                         | hypothetical protein |
| 794629 | SNV | PA0727 | T | T |                         | hypothetical protein |
| 794650 | SNV | PA0727 | G | C |                         | hypothetical protein |
| 794650 | SNV | PA0727 | G | G |                         | hypothetical protein |
| 794680 | SNV | PA0727 | G | C |                         | hypothetical protein |
| 794680 | SNV | PA0727 | G | G |                         | hypothetical protein |
| 795025 | SNV | PA0727 | G | C |                         | hypothetical protein |
| 795025 | SNV | PA0727 | G | G |                         | hypothetical protein |
| 795028 | SNV | PA0727 | G | G |                         | hypothetical protein |

|        |          |        |   |   |                         |                      |
|--------|----------|--------|---|---|-------------------------|----------------------|
| 795028 | SNV      | PA0727 | G | T |                         | hypothetical protein |
| 795296 | SNV      | PA0727 | C | A | NP_249418.1:p.Leu266Ile | hypothetical protein |
| 795296 | SNV      | PA0727 | C | C |                         | hypothetical protein |
| 795304 | SNV      | PA0727 | C | C |                         | hypothetical protein |
| 795304 | SNV      | PA0727 | C | T |                         | hypothetical protein |
| 795310 | SNV      | PA0727 | C | C |                         | hypothetical protein |
| 795310 | SNV      | PA0727 | C | T |                         | hypothetical protein |
| 795313 | SNV      | PA0727 | T | C |                         | hypothetical protein |
| 795313 | SNV      | PA0727 | T | T |                         | hypothetical protein |
| 795349 | SNV      | PA0727 | C | C |                         | hypothetical protein |
| 795349 | SNV      | PA0727 | C | T |                         | hypothetical protein |
| 795370 | SNV      | PA0727 | T | C |                         | hypothetical protein |
| 795370 | SNV      | PA0727 | T | T |                         | hypothetical protein |
| 795385 | SNV      | PA0727 | T | C |                         | hypothetical protein |
| 795385 | SNV      | PA0727 | T | T |                         | hypothetical protein |
| 795391 | SNV      | PA0727 | G | C |                         | hypothetical protein |
| 795391 | SNV      | PA0727 | G | G |                         | hypothetical protein |
| 795403 | SNV      | PA0727 | C | C |                         | hypothetical protein |
| 795403 | SNV      | PA0727 | C | T |                         | hypothetical protein |
| 795406 | SNV      | PA0727 | G | A |                         | hypothetical protein |
| 795406 | SNV      | PA0727 | G | G |                         | hypothetical protein |
| 795409 | SNV      | PA0727 | A | A |                         | hypothetical protein |
| 795409 | SNV      | PA0727 | A | G |                         | hypothetical protein |
| 795412 | SNV      | PA0727 | A | A |                         | hypothetical protein |
| 795412 | SNV      | PA0727 | A | G |                         | hypothetical protein |
| 795424 | SNV      | PA0727 | C | C |                         | hypothetical protein |
| 795424 | SNV      | PA0727 | C | T |                         | hypothetical protein |
| 795432 | Deletion | PA0727 | A | - | NP_249418.1:p.Ser312fs  | hypothetical protein |
| 795432 | SNV      | PA0727 | A | A |                         | hypothetical protein |
| 795434 | SNV      | PA0727 | A | A |                         | hypothetical protein |

|         |          |        |   |   |                         |                                    |
|---------|----------|--------|---|---|-------------------------|------------------------------------|
| 795434  | SNV      | PA0727 | A | G | NP_249418.1:p.Ser312Gly | hypothetical protein               |
| 795667  | SNV      | PA0727 | T | C |                         | hypothetical protein               |
| 795667  | SNV      | PA0727 | T | T |                         | hypothetical protein               |
| 795671  | SNV      | PA0727 | C | C |                         | hypothetical protein               |
| 795671  | SNV      | PA0727 | C | T |                         | hypothetical protein               |
| 795742  | SNV      | PA0727 | C | C |                         | hypothetical protein               |
| 795742  | SNV      | PA0727 | C | T |                         | hypothetical protein               |
| 795745  | SNV      | PA0727 | A | A |                         | hypothetical protein               |
| 795745  | SNV      | PA0727 | A | C |                         | hypothetical protein               |
| 795754  | SNV      | PA0727 | G | C |                         | hypothetical protein               |
| 795754  | SNV      | PA0727 | G | G |                         | hypothetical protein               |
| 795766  | SNV      | PA0727 | G | C |                         | hypothetical protein               |
| 795766  | SNV      | PA0727 | G | G |                         | hypothetical protein               |
| 1587916 | SNV      | PA1458 | T | C |                         | two-component sensor               |
| 1587919 | SNV      | PA1458 | G | T | NP_250149.1:p.Glu299Asp | two-component sensor               |
| 1587941 | SNV      | PA1458 | T | G | NP_250149.1:p.Ser307Ala | two-component sensor               |
| 1587943 | SNV      | PA1458 | G | A |                         | two-component sensor               |
| 1856056 | SNV      | exsC   | C | C |                         | exoenzyme S synthesis protein C    |
| 1856056 | SNV      | exsC   | C | G |                         | exoenzyme S synthesis protein C    |
| 1856058 | SNV      | exsC   | A | A |                         | exoenzyme S synthesis protein C    |
| 1856058 | SNV      | exsC   | A | G | NP_250401.1:p.Glu66Gly  | exoenzyme S synthesis protein C    |
| 3230295 | SNV      | PA2877 | A | A |                         | transcriptional regulator          |
| 3230295 | SNV      | PA2877 | A | G | NP_251567.1:p.Leu293Pro | transcriptional regulator          |
| 4145307 | SNV      | wspF   | C | A | NP_252392.1:p.Glu214*   | chemotaxis-specific methylesterase |
| 4699910 | Deletion |        | C | - |                         |                                    |
| 5242141 | SNV      |        | G | C |                         |                                    |
| 5242141 | SNV      |        | G | G |                         |                                    |

|                |           |        |    |        |                                      |                               |
|----------------|-----------|--------|----|--------|--------------------------------------|-------------------------------|
| 721663..721664 | MNV       |        | TC | CT     |                                      |                               |
| 789219..789220 | MNV       |        | GG | AT     |                                      |                               |
| 789219..789220 | MNV       |        | GG | GG     |                                      |                               |
| 794989..794990 | MNV       | PA0727 | CT | CT     |                                      | hypothetical protein          |
| 794989..794990 | MNV       | PA0727 | CT | GC     |                                      | hypothetical protein          |
| 795009..795010 | MNV       | PA0727 | AA | AA     |                                      | hypothetical protein          |
| 795009..795010 | MNV       | PA0727 | AA | CG     | NP_249418.1:p.Lys170Thr              | hypothetical protein          |
| 795019^795020  | Insertion | PA0727 | -  | -      |                                      | hypothetical protein          |
| 795019^795020  | Insertion | PA0727 | -  | T      | NP_249418.1:p.Asp174fs               | hypothetical protein          |
| 98901^98902    | Insertion | fha1   | -  | -      |                                      | Fha domain-containing protein |
| 98901^98902    | Insertion | fha1   | -  | TGGCTG | NP_248771.1:p.Pro285_Ala286insGlnPro | Fha domain-containing protein |

## RSCV 6

| Region | Type | Gene | Original sequence | Sequence Change | Amino acid change | Functional Group |
|--------|------|------|-------------------|-----------------|-------------------|------------------|
| 64793  | SNV  |      | A                 | A               |                   |                  |
| 64793  | SNV  |      | A                 | G               |                   |                  |
| 721670 | SNV  |      | A                 | G               |                   |                  |
| 788573 | SNV  |      | T                 | C               |                   |                  |
| 788573 | SNV  |      | T                 | T               |                   |                  |
| 788581 | SNV  |      | G                 | G               |                   |                  |
| 788581 | SNV  |      | G                 | T               |                   |                  |
| 789170 | SNV  |      | C                 | C               |                   |                  |
| 789170 | SNV  |      | C                 | T               |                   |                  |
| 789185 | SNV  |      | A                 | A               |                   |                  |

|        |     |        |   |   |                         |                      |
|--------|-----|--------|---|---|-------------------------|----------------------|
| 789185 | SNV |        | A | C |                         |                      |
| 789266 | SNV |        | C | C |                         |                      |
| 789266 | SNV |        | C | T |                         |                      |
| 789288 | SNV |        | C | C |                         |                      |
| 789288 | SNV |        | C | T |                         |                      |
| 792359 | SNV | PA0724 | C | C |                         | phage coat protein A |
| 792359 | SNV | PA0724 | C | T |                         | phage coat protein A |
| 792401 | SNV | PA0724 | C | A | NP_249415.1:p.Asp344Glu | phage coat protein A |
| 792401 | SNV | PA0724 | C | C |                         | phage coat protein A |
| 792443 | SNV | PA0724 | T | C |                         | phage coat protein A |
| 792443 | SNV | PA0724 | T | T |                         | phage coat protein A |
| 792455 | SNV | PA0724 | C | C |                         | phage coat protein A |
| 792455 | SNV | PA0724 | C | T |                         | phage coat protein A |
| 792590 | SNV | PA0724 | G | A |                         | phage coat protein A |
| 792590 | SNV | PA0724 | G | G |                         | phage coat protein A |
| 792608 | SNV | PA0724 | C | C |                         | phage coat protein A |
| 792608 | SNV | PA0724 | C | T |                         | phage coat protein A |
| 795025 | SNV | PA0727 | G | C |                         | hypothetical protein |
| 795025 | SNV | PA0727 | G | G |                         | hypothetical protein |
| 795028 | SNV | PA0727 | G | G |                         | hypothetical protein |
| 795028 | SNV | PA0727 | G | T |                         | hypothetical protein |
| 795667 | SNV | PA0727 | T | C |                         | hypothetical protein |
| 795667 | SNV | PA0727 | T | T |                         | hypothetical protein |
| 795671 | SNV | PA0727 | C | C |                         | hypothetical protein |
| 795671 | SNV | PA0727 | C | T |                         | hypothetical protein |
| 795742 | SNV | PA0727 | C | C |                         | hypothetical protein |
| 795742 | SNV | PA0727 | C | T |                         | hypothetical protein |
| 795745 | SNV | PA0727 | A | A |                         | hypothetical protein |
| 795745 | SNV | PA0727 | A | C |                         | hypothetical protein |
| 795754 | SNV | PA0727 | G | C |                         | hypothetical protein |



|                  |           |        |      |    |                         |                                     |
|------------------|-----------|--------|------|----|-------------------------|-------------------------------------|
| 795754           | SNV       | PA0727 | G    | G  |                         | hypothetical protein                |
| 795766           | SNV       | PA0727 | G    | C  |                         | hypothetical protein                |
| 795766           | SNV       | PA0727 | G    | G  |                         | hypothetical protein                |
| 1275767          | Deletion  | napA   | A    | -  | NP_249865.1:p.Phe11fs   | nitrate reductase catalytic subunit |
| 1587916          | SNV       | PA1458 | T    | C  |                         | two-component sensor                |
| 1587919          | SNV       | PA1458 | G    | T  | NP_250149.1:p.Glu299Asp | two-component sensor                |
| 1587941          | SNV       | PA1458 | T    | G  | NP_250149.1:p.Ser307Ala | two-component sensor                |
| 1587943          | SNV       | PA1458 | G    | A  |                         | two-component sensor                |
| 1856056          | SNV       | exsC   | C    | C  |                         | exoenzyme S synthesis protein C     |
| 1856056          | SNV       | exsC   | C    | G  |                         | exoenzyme S synthesis protein C     |
| 1856058          | SNV       | exsC   | A    | A  |                         | exoenzyme S synthesis protein C     |
| 1856058          | SNV       | exsC   | A    | G  | NP_250401.1:p.Glu66Gly  | exoenzyme S synthesis protein C     |
| 3230295          | SNV       | PA2877 | A    | A  |                         | transcriptional regulator           |
| 3230295          | SNV       | PA2877 | A    | G  | NP_251567.1:p.Leu293Pro | transcriptional regulator           |
| 4145096          | SNV       | wspF   | A    | C  | NP_252392.1:p.Leu284Arg | chemotaxis-specific methylesterase  |
| 4699910          | Deletion  |        | C    | -  |                         |                                     |
| 6132110          | SNV       | uvrD   | C    | A  | NP_254130.1:p.Ser341Arg | DNA-dependent helicase II           |
| 2195457^2195458  | Insertion |        | -    | C  |                         |                                     |
| 2753522^2753523  | Insertion | PA2451 | -    | C  |                         |                                     |
| 5071544..5071547 | Deletion  |        | ACTG | -  |                         |                                     |
| 667028^667029    | Insertion |        | -    | C  |                         |                                     |
| 721663..721664   | MNV       |        | TC   | CT |                         |                                     |
| 789219..789220   | MNV       |        | GG   | AT |                         |                                     |
| 789219..789220   | MNV       |        | GG   | GG |                         |                                     |
| 794989..794990   | MNV       | PA0727 | CT   | CT |                         | hypothetical protein                |
| 794989..794990   | MNV       | PA0727 | CT   | GC |                         | hypothetical protein                |
| 795009..795010   | MNV       | PA0727 | AA   | AA |                         | hypothetical protein                |

|                |           |        |    |    |                         |                      |  |
|----------------|-----------|--------|----|----|-------------------------|----------------------|--|
| 795009..795010 | MNV       | PA0727 | AA | CG | NP_249418.1:p.Lys170Thr | hypothetical protein |  |
| 795019^795020  | Insertion | PA0727 | -  | -  |                         | hypothetical protein |  |
| 795019^795020  | Insertion | PA0727 | -  | T  | NP_249418.1:p.Asp174fs  | hypothetical protein |  |
| 816529^816530  | Insertion | PA0748 | -  | C  |                         |                      |  |

## RSCV 7

| Region         | Type | Gene | Original sequence | Sequence Change | Amino acid change | Functional Group |  |
|----------------|------|------|-------------------|-----------------|-------------------|------------------|--|
| 64793          | SNV  |      | A                 | A               |                   |                  |  |
| 64793          | SNV  |      | A                 | G               |                   |                  |  |
| 788573         | SNV  |      | T                 | C               |                   |                  |  |
| 788573         | SNV  |      | T                 | T               |                   |                  |  |
| 788581         | SNV  |      | G                 | G               |                   |                  |  |
| 788581         | SNV  |      | G                 | T               |                   |                  |  |
| 789170         | SNV  |      | C                 | C               |                   |                  |  |
| 789170         | SNV  |      | C                 | T               |                   |                  |  |
| 789185         | SNV  |      | A                 | A               |                   |                  |  |
| 789185         | SNV  |      | A                 | C               |                   |                  |  |
| 789219..789220 | MNV  |      | GG                | AT              |                   |                  |  |

|                |          |        |    |    |                         |                                 |
|----------------|----------|--------|----|----|-------------------------|---------------------------------|
| 789219..789220 | MNV      |        | GG | GG |                         |                                 |
| 795667         | SNV      | PA0727 | T  | C  |                         | hypothetical protein            |
| 795667         | SNV      | PA0727 | T  | T  |                         | hypothetical protein            |
| 795671         | SNV      | PA0727 | C  | C  |                         | hypothetical protein            |
| 795671         | SNV      | PA0727 | C  | T  |                         | hypothetical protein            |
| 795742         | SNV      | PA0727 | C  | C  |                         | hypothetical protein            |
| 795742         | SNV      | PA0727 | C  | T  |                         | hypothetical protein            |
| 795745         | SNV      | PA0727 | A  | A  |                         | hypothetical protein            |
| 795745         | SNV      | PA0727 | A  | C  |                         | hypothetical protein            |
| 795754         | SNV      | PA0727 | G  | C  |                         | hypothetical protein            |
| 795754         | SNV      | PA0727 | G  | G  |                         | hypothetical protein            |
| 795766         | SNV      | PA0727 | G  | C  |                         | hypothetical protein            |
| 795766         | SNV      | PA0727 | G  | G  |                         | hypothetical protein            |
| 1856056        | SNV      | exsC   | C  | C  |                         | exoenzyme S synthesis protein C |
| 1856056        | SNV      | exsC   | C  | G  |                         | exoenzyme S synthesis protein C |
| 1856058        | SNV      | exsC   | A  | A  |                         | exoenzyme S synthesis protein C |
| 1856058        | SNV      | exsC   | A  | G  | NP_250401.1:p.Glu66Gly  | exoenzyme S synthesis protein C |
| 3230295        | SNV      | PA2877 | A  | A  |                         | transcriptional regulator       |
| 3230295        | SNV      | PA2877 | A  | G  | NP_251567.1:p.Leu293Pro | transcriptional regulator       |
| 4699910        | Deletion |        | C  | -  |                         |                                 |
|                |          |        |    |    |                         |                                 |
| 721663..721664 | MNV      |        | TC | CT |                         |                                 |
| 721670         | SNV      |        | A  | G  |                         |                                 |
| 721718         | SNV      |        | A  | G  |                         |                                 |
| 721725         | SNV      |        | C  | T  |                         |                                 |
| 721740         | SNV      |        | C  | T  |                         |                                 |
| 794989..794990 | MNV      | PA0727 | CT | CT |                         | hypothetical protein            |
| 794989..794990 | MNV      | PA0727 | CT | GC |                         | hypothetical protein            |

|                  |           |        |      |    |                         |                                    |
|------------------|-----------|--------|------|----|-------------------------|------------------------------------|
| 795009..795010   | MNV       | PA0727 | AA   | AA |                         | hypothetical protein               |
| 795009..795010   | MNV       | PA0727 | AA   | CG | NP_249418.1:p.Lys170Thr | hypothetical protein               |
| 795019^795020    | Insertion | PA0727 | -    | -  |                         | hypothetical protein               |
| 795019^795020    | Insertion | PA0727 | -    | T  | NP_249418.1:p.Asp174fs  | hypothetical protein               |
| 795025           | SNV       | PA0727 | G    | C  |                         | hypothetical protein               |
| 795025           | SNV       | PA0727 | G    | G  |                         | hypothetical protein               |
| 795028           | SNV       | PA0727 | G    | G  |                         | hypothetical protein               |
| 795028           | SNV       | PA0727 | G    | T  |                         | hypothetical protein               |
| 795385           | SNV       | PA0727 | T    | C  |                         | hypothetical protein               |
| 795385           | SNV       | PA0727 | T    | T  |                         | hypothetical protein               |
| 795391           | SNV       | PA0727 | G    | C  |                         | hypothetical protein               |
| 795391           | SNV       | PA0727 | G    | G  |                         | hypothetical protein               |
| 795403           | SNV       | PA0727 | C    | C  |                         | hypothetical protein               |
| 795403           | SNV       | PA0727 | C    | T  |                         | hypothetical protein               |
| 795406           | SNV       | PA0727 | G    | A  |                         | hypothetical protein               |
| 795406           | SNV       | PA0727 | G    | G  |                         | hypothetical protein               |
| 795409           | SNV       | PA0727 | A    | A  |                         | hypothetical protein               |
| 795409           | SNV       | PA0727 | A    | G  |                         | hypothetical protein               |
| 795412           | SNV       | PA0727 | A    | A  |                         | hypothetical protein               |
| 795412           | SNV       | PA0727 | A    | G  |                         | hypothetical protein               |
| 795424           | SNV       | PA0727 | C    | C  |                         | hypothetical protein               |
| 795424           | SNV       | PA0727 | C    | T  |                         | hypothetical protein               |
| 795432           | Deletion  | PA0727 | A    | -  | NP_249418.1:p.Ser312fs  | hypothetical protein               |
| 795432           | SNV       | PA0727 | A    | A  |                         | hypothetical protein               |
| 795434           | SNV       | PA0727 | A    | A  |                         | hypothetical protein               |
| 795434           | SNV       | PA0727 | A    | G  | NP_249418.1:p.Ser312Gly | hypothetical protein               |
| 795472           | SNV       | PA0727 | G    | C  |                         | hypothetical protein               |
| 795472           | SNV       | PA0727 | G    | G  |                         | hypothetical protein               |
| 4145114..4145117 | Deletion  | wspF   | CGGC | -  | NP_252392.1:p.Gly277fs  | chemotaxis-specific methylesterase |

**RSCV 8**

| Region | Type | Gene | Original sequence | Sequence Change | Amino acid change | Functional Group |
|--------|------|------|-------------------|-----------------|-------------------|------------------|
| 64793  | SNV  |      | A                 | A               |                   |                  |
| 64793  | SNV  |      | A                 | G               |                   |                  |
| 721670 | SNV  |      | A                 | G               |                   |                  |
| 721725 | SNV  |      | C                 | T               |                   |                  |
| 788573 | SNV  |      | T                 | C               |                   |                  |
| 788573 | SNV  |      | T                 | T               |                   |                  |
| 788581 | SNV  |      | G                 | G               |                   |                  |
| 788581 | SNV  |      | G                 | T               |                   |                  |
| 789170 | SNV  |      | C                 | C               |                   |                  |
| 789170 | SNV  |      | C                 | T               |                   |                  |
| 789185 | SNV  |      | A                 | A               |                   |                  |
| 789185 | SNV  |      | A                 | C               |                   |                  |

|        |     |        |   |   |                        |                      |
|--------|-----|--------|---|---|------------------------|----------------------|
| 789266 | SNV |        | C | C |                        |                      |
| 789266 | SNV |        | C | T |                        |                      |
| 789288 | SNV |        | C | C |                        |                      |
| 789288 | SNV |        | C | T |                        |                      |
| 789332 | SNV |        | C | C |                        |                      |
| 789332 | SNV |        | C | T |                        |                      |
| 789409 | SNV | PA0718 | C | C |                        | hypothetical protein |
| 789409 | SNV | PA0718 | C | G | NP_249409.1:p.Ala17Gly | hypothetical protein |
| 789439 | SNV | PA0718 | T | C | NP_249409.1:p.Val27Ala | hypothetical protein |
| 789439 | SNV | PA0718 | T | T |                        | hypothetical protein |
| 789470 | SNV | PA0718 | A | A |                        | hypothetical protein |
| 789470 | SNV | PA0718 | A | G |                        | hypothetical protein |
| 789473 | SNV | PA0718 | C | C |                        | hypothetical protein |
| 789473 | SNV | PA0718 | C | T |                        | hypothetical protein |
| 789476 | SNV | PA0718 | T | C |                        | hypothetical protein |
| 789476 | SNV | PA0718 | T | T |                        | hypothetical protein |
| 789505 | SNV | PA0718 | G | A | NP_249409.1:p.Gly49Asp | hypothetical protein |
| 789505 | SNV | PA0718 | G | G |                        | hypothetical protein |
| 789602 | SNV | PA0718 | G | A |                        | hypothetical protein |
| 789602 | SNV | PA0718 | G | G |                        | hypothetical protein |
| 794806 | SNV | PA0727 | T | C |                        | hypothetical protein |
| 794806 | SNV | PA0727 | T | T |                        | hypothetical protein |
| 794827 | SNV | PA0727 | T | C |                        | hypothetical protein |
| 794827 | SNV | PA0727 | T | T |                        | hypothetical protein |
| 794962 | SNV | PA0727 | A | A |                        | hypothetical protein |
| 794962 | SNV | PA0727 | A | G |                        | hypothetical protein |
| 794974 | SNV | PA0727 | C | A |                        | hypothetical protein |
| 794974 | SNV | PA0727 | C | C |                        | hypothetical protein |
| 794990 | SNV | PA0727 | T | C |                        | hypothetical protein |
| 794990 | SNV | PA0727 | T | T |                        | hypothetical protein |

|        |          |        |   |   |                         |                      |
|--------|----------|--------|---|---|-------------------------|----------------------|
| 795031 | SNV      | PA0727 | C | C |                         | hypothetical protein |
| 795031 | SNV      | PA0727 | C | T |                         | hypothetical protein |
| 795058 | SNV      | PA0727 | G | A |                         | hypothetical protein |
| 795058 | SNV      | PA0727 | G | G |                         | hypothetical protein |
| 795088 | SNV      | PA0727 | A | A |                         | hypothetical protein |
| 795088 | SNV      | PA0727 | A | G |                         | hypothetical protein |
| 795385 | SNV      | PA0727 | T | C |                         | hypothetical protein |
| 795385 | SNV      | PA0727 | T | T |                         | hypothetical protein |
| 795391 | SNV      | PA0727 | G | C |                         | hypothetical protein |
| 795391 | SNV      | PA0727 | G | G |                         | hypothetical protein |
| 795403 | SNV      | PA0727 | C | C |                         | hypothetical protein |
| 795403 | SNV      | PA0727 | C | T |                         | hypothetical protein |
| 795406 | SNV      | PA0727 | G | A |                         | hypothetical protein |
| 795406 | SNV      | PA0727 | G | G |                         | hypothetical protein |
| 795409 | SNV      | PA0727 | A | A |                         | hypothetical protein |
| 795409 | SNV      | PA0727 | A | G |                         | hypothetical protein |
| 795412 | SNV      | PA0727 | A | A |                         | hypothetical protein |
| 795412 | SNV      | PA0727 | A | G |                         | hypothetical protein |
| 795424 | SNV      | PA0727 | C | C |                         | hypothetical protein |
| 795424 | SNV      | PA0727 | C | T |                         | hypothetical protein |
| 795432 | Deletion | PA0727 | A | - | NP_249418.1:p.Ser312fs  | hypothetical protein |
| 795432 | SNV      | PA0727 | A | A |                         | hypothetical protein |
| 795434 | SNV      | PA0727 | A | A |                         | hypothetical protein |
| 795434 | SNV      | PA0727 | A | G | NP_249418.1:p.Ser312Gly | hypothetical protein |
| 795472 | SNV      | PA0727 | G | C |                         | hypothetical protein |
| 795472 | SNV      | PA0727 | G | G |                         | hypothetical protein |
| 795742 | SNV      | PA0727 | C | C |                         | hypothetical protein |
| 795742 | SNV      | PA0727 | C | T |                         | hypothetical protein |
| 795745 | SNV      | PA0727 | A | A |                         | hypothetical protein |
| 795745 | SNV      | PA0727 | A | C |                         | hypothetical protein |

|                |          |        |    |    |                         |                                    |
|----------------|----------|--------|----|----|-------------------------|------------------------------------|
| 795754         | SNV      | PA0727 | G  | C  |                         | hypothetical protein               |
| 795754         | SNV      | PA0727 | G  | G  |                         | hypothetical protein               |
| 795766         | SNV      | PA0727 | G  | C  |                         | hypothetical protein               |
| 795766         | SNV      | PA0727 | G  | G  |                         | hypothetical protein               |
| 1587916        | SNV      | PA1458 | T  | C  |                         | two-component sensor               |
| 1587919        | SNV      | PA1458 | G  | T  | NP_250149.1:p.Glu299Asp | two-component sensor               |
| 1856056        | SNV      | exsC   | C  | C  |                         | exoenzyme S synthesis protein C    |
| 1856056        | SNV      | exsC   | C  | G  |                         | exoenzyme S synthesis protein C    |
| 1856058        | SNV      | exsC   | A  | A  |                         | exoenzyme S synthesis protein C    |
| 1856058        | SNV      | exsC   | A  | G  | NP_250401.1:p.Glu66Gly  | exoenzyme S synthesis protein C    |
| 3230295        | SNV      | PA2877 | A  | A  |                         | transcriptional regulator          |
| 3230295        | SNV      | PA2877 | A  | G  | NP_251567.1:p.Leu293Pro | transcriptional regulator          |
| 4145307        | SNV      | wspF   | C  | A  | NP_252392.1:p.Glu214*   | chemotaxis-specific methylesterase |
| 4699910        | Deletion |        | C  | -  |                         |                                    |
| 5242141        | SNV      |        | G  | C  |                         |                                    |
| 5242141        | SNV      |        | G  | G  |                         |                                    |
| 721663..721664 | MNV      |        | TC | CT |                         |                                    |
| 789219..789220 | MNV      |        | GG | AT |                         |                                    |
| 789219..789220 | MNV      |        | GG | GG |                         |                                    |



**RSCV 9**

| Region | Type | Gene | Original sequence | Sequence Change | Amino acid change | Functional Group |
|--------|------|------|-------------------|-----------------|-------------------|------------------|
| 64793  | SNV  |      | A                 | A               |                   |                  |
| 64793  | SNV  |      | A                 | G               |                   |                  |
| 721670 | SNV  |      | A                 | G               |                   |                  |
| 721718 | SNV  |      | A                 | G               |                   |                  |
| 721725 | SNV  |      | C                 | T               |                   |                  |
| 721740 | SNV  |      | C                 | T               |                   |                  |
| 788573 | SNV  |      | T                 | C               |                   |                  |
| 788573 | SNV  |      | T                 | T               |                   |                  |
| 788581 | SNV  |      | G                 | G               |                   |                  |
| 788581 | SNV  |      | G                 | T               |                   |                  |
| 789170 | SNV  |      | C                 | C               |                   |                  |
| 789170 | SNV  |      | C                 | T               |                   |                  |

|        |     |        |   |   |                        |                      |
|--------|-----|--------|---|---|------------------------|----------------------|
| 789185 | SNV |        | A | A |                        |                      |
| 789185 | SNV |        | A | C |                        |                      |
| 789266 | SNV |        | C | C |                        |                      |
| 789266 | SNV |        | C | T |                        |                      |
| 789288 | SNV |        | C | C |                        |                      |
| 789288 | SNV |        | C | T |                        |                      |
| 789332 | SNV |        | C | C |                        |                      |
| 789332 | SNV |        | C | T |                        |                      |
| 789409 | SNV | PA0718 | C | C |                        | hypothetical protein |
| 789409 | SNV | PA0718 | C | G | NP_249409.1:p.Ala17Gly | hypothetical protein |
| 789439 | SNV | PA0718 | T | C | NP_249409.1:p.Val27Ala | hypothetical protein |
| 789439 | SNV | PA0718 | T | T |                        | hypothetical protein |
| 789470 | SNV | PA0718 | A | A |                        | hypothetical protein |
| 789470 | SNV | PA0718 | A | G |                        | hypothetical protein |
| 789473 | SNV | PA0718 | C | C |                        | hypothetical protein |
| 789473 | SNV | PA0718 | C | T |                        | hypothetical protein |
| 789476 | SNV | PA0718 | T | C |                        | hypothetical protein |
| 789476 | SNV | PA0718 | T | T |                        | hypothetical protein |
| 789505 | SNV | PA0718 | G | A | NP_249409.1:p.Gly49Asp | hypothetical protein |
| 789505 | SNV | PA0718 | G | G |                        | hypothetical protein |
| 793996 | SNV | PA0726 | C | C |                        | hypothetical protein |
| 793996 | SNV | PA0726 | C | T |                        | hypothetical protein |
| 794430 | SNV |        | C | C |                        |                      |
| 794430 | SNV |        | C | T |                        |                      |
| 795025 | SNV | PA0727 | G | C |                        | hypothetical protein |
| 795025 | SNV | PA0727 | G | G |                        | hypothetical protein |
| 795028 | SNV | PA0727 | G | G |                        | hypothetical protein |
| 795028 | SNV | PA0727 | G | T |                        | hypothetical protein |
| 795385 | SNV | PA0727 | T | C |                        | hypothetical protein |
| 795385 | SNV | PA0727 | T | T |                        | hypothetical protein |

|         |     |        |   |   |                         |                                 |
|---------|-----|--------|---|---|-------------------------|---------------------------------|
| 795391  | SNV | PA0727 | G | C |                         | hypothetical protein            |
| 795391  | SNV | PA0727 | G | G |                         | hypothetical protein            |
| 795403  | SNV | PA0727 | C | C |                         | hypothetical protein            |
| 795403  | SNV | PA0727 | C | T |                         | hypothetical protein            |
| 795406  | SNV | PA0727 | G | A |                         | hypothetical protein            |
| 795406  | SNV | PA0727 | G | G |                         | hypothetical protein            |
| 795409  | SNV | PA0727 | A | A |                         | hypothetical protein            |
| 795409  | SNV | PA0727 | A | G |                         | hypothetical protein            |
| 795412  | SNV | PA0727 | A | A |                         | hypothetical protein            |
| 795412  | SNV | PA0727 | A | G |                         | hypothetical protein            |
| 795667  | SNV | PA0727 | T | C |                         | hypothetical protein            |
| 795667  | SNV | PA0727 | T | T |                         | hypothetical protein            |
| 795671  | SNV | PA0727 | C | C |                         | hypothetical protein            |
| 795671  | SNV | PA0727 | C | T |                         | hypothetical protein            |
| 795742  | SNV | PA0727 | C | C |                         | hypothetical protein            |
| 795742  | SNV | PA0727 | C | T |                         | hypothetical protein            |
| 795745  | SNV | PA0727 | A | A |                         | hypothetical protein            |
| 795745  | SNV | PA0727 | A | C |                         | hypothetical protein            |
| 795754  | SNV | PA0727 | G | C |                         | hypothetical protein            |
| 795754  | SNV | PA0727 | G | G |                         | hypothetical protein            |
| 795766  | SNV | PA0727 | G | C |                         | hypothetical protein            |
| 795766  | SNV | PA0727 | G | G |                         | hypothetical protein            |
| 1587916 | SNV | PA1458 | T | C |                         | two-component sensor            |
| 1587919 | SNV | PA1458 | G | T | NP_250149.1:p.Glu299Asp | two-component sensor            |
| 1587941 | SNV | PA1458 | T | G | NP_250149.1:p.Ser307Ala | two-component sensor            |
| 1587943 | SNV | PA1458 | G | A |                         | two-component sensor            |
| 1856056 | SNV | exsC   | C | C |                         | exoenzyme S synthesis protein C |
| 1856056 | SNV | exsC   | C | G |                         | exoenzyme S synthesis protein C |
| 1856058 | SNV | exsC   | A | A |                         | exoenzyme S synthesis           |

|                |           |        |    |    |                         |                                    |
|----------------|-----------|--------|----|----|-------------------------|------------------------------------|
|                |           |        |    |    |                         | protein C                          |
| 1856058        | SNV       | exsC   | A  | G  | NP_250401.1:p.Glu66Gly  | exoenzyme S synthesis protein C    |
| 3230295        | SNV       | PA2877 | A  | A  |                         | transcriptional regulator          |
| 3230295        | SNV       | PA2877 | A  | G  | NP_251567.1:p.Leu293Pro | transcriptional regulator          |
| 4145058        | SNV       | wspF   | G  | A  | NP_252392.1:p.Gln297*   | chemotaxis-specific methylesterase |
| 4699910        | Deletion  |        | C  | -  |                         |                                    |
| 5242141        | SNV       |        | G  | C  |                         |                                    |
| 5242141        | SNV       |        | G  | G  |                         |                                    |
| 721663..721664 | MNV       |        | TC | CT |                         |                                    |
| 789219..789220 | MNV       |        | GG | AT |                         |                                    |
| 789219..789220 | MNV       |        | GG | GG |                         |                                    |
| 794290..794291 | MNV       |        | CC | CC |                         |                                    |
| 794290..794291 | MNV       |        | CC | TT |                         |                                    |
| 794989..794990 | MNV       | PA0727 | CT | CT |                         | hypothetical protein               |
| 794989..794990 | MNV       | PA0727 | CT | GC |                         | hypothetical protein               |
| 795009..795010 | MNV       | PA0727 | AA | AA |                         | hypothetical protein               |
| 795009..795010 | MNV       | PA0727 | AA | CG | NP_249418.1:p.Lys170Thr | hypothetical protein               |
| 795019^795020  | Insertion | PA0727 | -  | -  |                         | hypothetical protein               |
| 795019^795020  | Insertion | PA0727 | -  | T  | NP_249418.1:p.Asp174fs  | hypothetical protein               |

**RSCV 10**

| Region | Type | Gene | Original sequence | Sequence Change | Amino acid change | Functional Group |
|--------|------|------|-------------------|-----------------|-------------------|------------------|
| 64793  | SNV  |      | A                 | A               |                   |                  |
| 64793  | SNV  |      | A                 | G               |                   |                  |
| 721670 | SNV  |      | A                 | G               |                   |                  |
| 721718 | SNV  |      | A                 | G               |                   |                  |
| 721725 | SNV  |      | C                 | T               |                   |                  |
| 721740 | SNV  |      | C                 | T               |                   |                  |
| 788573 | SNV  |      | T                 | C               |                   |                  |
| 788573 | SNV  |      | T                 | T               |                   |                  |
| 788581 | SNV  |      | G                 | G               |                   |                  |
| 788581 | SNV  |      | G                 | T               |                   |                  |
| 789170 | SNV  |      | C                 | C               |                   |                  |
| 789170 | SNV  |      | C                 | T               |                   |                  |

|        |     |            |   |   |                        |                      |
|--------|-----|------------|---|---|------------------------|----------------------|
| 789185 | SNV |            | A | A |                        |                      |
| 789185 | SNV |            | A | C |                        |                      |
| 789266 | SNV |            | C | C |                        |                      |
| 789266 | SNV |            | C | T |                        |                      |
| 789288 | SNV |            | C | C |                        |                      |
| 789288 | SNV |            | C | T |                        |                      |
| 789332 | SNV |            | C | C |                        |                      |
| 789332 | SNV |            | C | T |                        |                      |
| 789409 | SNV | PA071<br>8 | C | C |                        | hypothetical protein |
| 789409 | SNV | PA071<br>8 | C | G | NP_249409.1:p.Ala17Gly | hypothetical protein |
| 795025 | SNV | PA072<br>7 | G | C |                        | hypothetical protein |
| 795025 | SNV | PA072<br>7 | G | G |                        | hypothetical protein |
| 795028 | SNV | PA072<br>7 | G | G |                        | hypothetical protein |
| 795028 | SNV | PA072<br>7 | G | T |                        | hypothetical protein |
| 795385 | SNV | PA072<br>7 | T | C |                        | hypothetical protein |
| 795385 | SNV | PA072<br>7 | T | T |                        | hypothetical protein |
| 795391 | SNV | PA072<br>7 | G | C |                        | hypothetical protein |
| 795391 | SNV | PA072<br>7 | G | G |                        | hypothetical protein |
| 795403 | SNV | PA072<br>7 | C | C |                        | hypothetical protein |
| 795403 | SNV | PA072<br>7 | C | T |                        | hypothetical protein |
| 795406 | SNV | PA072<br>7 | G | A |                        | hypothetical protein |
| 795406 | SNV | PA072<br>7 | G | G |                        | hypothetical protein |

|         |          |            |   |   |                         |                      |
|---------|----------|------------|---|---|-------------------------|----------------------|
| 795409  | SNV      | PA072<br>7 | A | A |                         | hypothetical protein |
| 795409  | SNV      | PA072<br>7 | A | G |                         | hypothetical protein |
| 795412  | SNV      | PA072<br>7 | A | A |                         | hypothetical protein |
| 795412  | SNV      | PA072<br>7 | A | G |                         | hypothetical protein |
| 795424  | SNV      | PA072<br>7 | C | C |                         | hypothetical protein |
| 795424  | SNV      | PA072<br>7 | C | T |                         | hypothetical protein |
| 795432  | Deletion | PA072<br>7 | A | - | NP_249418.1:p.Ser312fs  | hypothetical protein |
| 795432  | SNV      | PA072<br>7 | A | A |                         | hypothetical protein |
| 795434  | SNV      | PA072<br>7 | A | A |                         | hypothetical protein |
| 795434  | SNV      | PA072<br>7 | A | G | NP_249418.1:p.Ser312Gly | hypothetical protein |
| 795472  | SNV      | PA072<br>7 | G | C |                         | hypothetical protein |
| 795472  | SNV      | PA072<br>7 | G | G |                         | hypothetical protein |
| 795745  | SNV      | PA072<br>7 | A | A |                         | hypothetical protein |
| 795745  | SNV      | PA072<br>7 | A | C |                         | hypothetical protein |
| 795754  | SNV      | PA072<br>7 | G | C |                         | hypothetical protein |
| 795754  | SNV      | PA072<br>7 | G | G |                         | hypothetical protein |
| 795766  | SNV      | PA072<br>7 | G | C |                         | hypothetical protein |
| 795766  | SNV      | PA072<br>7 | G | G |                         | hypothetical protein |
| 1587916 | SNV      | PA145<br>8 | T | C |                         | two-component sensor |
| 1587919 | SNV      | PA145      | G | T | NP_250149.1:p.Glu299Asp | two-component sensor |

|                  |           |        |                  |    |                                      |                                    |
|------------------|-----------|--------|------------------|----|--------------------------------------|------------------------------------|
|                  |           | 8      |                  |    |                                      |                                    |
| 1587941          | SNV       | PA1458 | T                | G  | NP_250149.1:p.Ser307Ala              | two-component sensor               |
| 1587943          | SNV       | PA1458 | G                | A  |                                      | two-component sensor               |
| 1856056          | SNV       | exsC   | C                | C  |                                      | exoenzyme S synthesis protein C    |
| 1856056          | SNV       | exsC   | C                | G  |                                      | exoenzyme S synthesis protein C    |
| 1856058          | SNV       | exsC   | A                | A  |                                      | exoenzyme S synthesis protein C    |
| 1856058          | SNV       | exsC   | A                | G  | NP_250401.1:p.Glu66Gly               | exoenzyme S synthesis protein C    |
| 3230295          | SNV       | PA2877 | A                | A  |                                      | transcriptional regulator          |
| 3230295          | SNV       | PA2877 | A                | G  | NP_251567.1:p.Leu293Pro              | transcriptional regulator          |
| 4699910          | Deletion  |        | C                | -  |                                      |                                    |
| 4144991..4145002 | Deletion  | wspF   | TGCACCGCTGC<br>A | -  | NP_252392.1:p.Asp315_Gln319delinsGlu | chemotaxis-specific methylesterase |
| 721663..721664   | MNV       |        | TC               | CT |                                      |                                    |
| 789219..789220   | MNV       |        | GG               | AT |                                      |                                    |
| 789219..789220   | MNV       |        | GG               | GG |                                      |                                    |
| 794989..794990   | MNV       | PA0727 | CT               | CT |                                      | hypothetical protein               |
| 794989..794990   | MNV       | PA0727 | CT               | GC |                                      | hypothetical protein               |
| 795009..795010   | MNV       | PA0727 | AA               | AA |                                      | hypothetical protein               |
| 795009..795010   | MNV       | PA0727 | AA               | CG | NP_249418.1:p.Lys170Thr              | hypothetical protein               |
| 795019^795020    | Insertion | PA0727 | -                | -  |                                      | hypothetical protein               |
| 795019^795020    | Insertion | PA0727 | -                | T  | NP_249418.1:p.Asp174fs               | hypothetical protein               |



## References

- 1 Holloway, B. W. & Morgan, A. F. Genome organization in *Pseudomonas*. *Annual review of microbiology* **40**, 79-105, doi:10.1146/annurev.mi.40.100186.000455 (1986).
- 2 Rybtke, M. T. *et al.* Fluorescence-based reporter for gauging cyclic di-GMP levels in *Pseudomonas aeruginosa*. *Appl Environ Microbiol* **78**, 5060-5069, doi:10.1128/AEM.00414-12 (2012).
- 3 Chen, Y. *et al.* Multiple diguanylate cyclase-coordinated regulation of pyoverdine synthesis in *Pseudomonas aeruginosa*. *Environmental microbiology reports* **7**, 498-507, doi:10.1111/1758-2229.12278 (2015).
- 4 Irie, Y. *et al.* Self-produced exopolysaccharide is a signal that stimulates biofilm formation in *Pseudomonas aeruginosa*. *Proc Natl Acad Sci U S A* **109**, 20632-20636, doi:10.1073/pnas.1217993109 (2012).
- 5 Chua, S. L. *et al.* Bis-(3'-5')-cyclic dimeric GMP regulates antimicrobial peptide resistance in *Pseudomonas aeruginosa*. *Antimicrobial agents and chemotherapy* **57**, 2066-2075, doi:10.1128/AAC.02499-12 (2013).
- 6 Yang, L. *et al.* Distinct roles of extracellular polymeric substances in *Pseudomonas aeruginosa* biofilm development. *Environ Microbiol* **13**, 1705-1717, doi:10.1111/j.1462-2920.2011.02503.x (2011).
- 7 Carlier, A. *et al.* Genome Sequence of *Burkholderia cenocepacia* H111, a Cystic Fibrosis Airway Isolate. *Genome announcements* **2**, doi:10.1128/genomeA.00298-14 (2014).
- 8 Lee, K. W. *et al.* Biofilm development and enhanced stress resistance of a model, mixed-species community biofilm. *The ISME journal* **8**, 894-907, doi:10.1038/ismej.2013.194 (2014).

- 9 Gjermansen, M., Nilsson, M., Yang, L. & Tolker-Nielsen, T. Characterization of starvation-induced dispersion in *Pseudomonas putida* biofilms: genetic elements and molecular mechanisms. *Molecular microbiology* **75**, 815-826, doi:10.1111/j.1365-2958.2009.06793.x (2010).
- 10 Kessler, B., de Lorenzo, V. & Timmis, K. N. A general system to integrate lacZ fusions into the chromosomes of gram-negative eubacteria: regulation of the Pm promoter of the TOL plasmid studied with all controlling elements in monocopy. *Molecular & general genetics* : *MGG* **233**, 293-301 (1992).
